# Supplementary material
Source: PubMed Central journal article supplement (PMC5870843)
Supplement: mod_supplement_btx316.pdf [file mod_supplement_btx316.pdf]

## Supplementary Text, Figures and Tables for DIRECTION: A machine learning framework for predicting and characterizing DNA methylation and hydroxymethylation in mammalian genomes

### S1. Binary labeling of cytosines in BS-seq and TAB-seq data

For methylation prediction, we chose a CCR threshold of 0.5 (equidistant from the extremal CCRs of 0 and 1) for labeling methylation status for individual cytosines as high or low ( $\geq 0.5$  or  $< 0.5$  respectively). For analyzing 5-hmC levels, a naive analysis yields a distribution with maximal frequency at the CCR of 0, and no other observable secondary modes in the distribution (Supp Fig 1B). However, it is well characterized that while most CpG sites have a CCR of 0, statistically significant hydroxymethylated CpG sites have a CCR frequency distribution with a mode of 0.18 (Supp Fig 1C) (Yu, M., et al. 2012). Thus, in order to label individual cytosines into significantly hydroxymethylated versus non-hydroxymethylated/weakly hydroxymethylated classes, we choose a threshold of 0.09, equidistant from 0 and 0.18.

### S2. Feasibility of 5-hmC status prediction

Strong preference of 5-hmC for open chromatin regions, as well as its positive correlation with gene expression and bias towards exon inclusion were previously documented in literature (Marina, R. J., et al. 2015, Mellen, M., et al. 2012), suggesting a functional role and consistency of 5-hmC modifications across biological replicates. 5-hmC modifications have also been shown to be temporally stable (Bachman, M., et al. 2014) further suggesting a strong signal to noise ratio in hydroxymethylation assays. At the outset, we performed pairwise comparison of hydroxymethylation levels across biological replicates in NPC, using binary discretization of hydroxymethylation levels. TAB-seq CCR correlation across biological replicates is less faithful than BS-seq by exhibiting some stochasticity in the signal. However, we obtain a concordance rate (fraction of cytosines where 5-hmC status between replicates agree) of 82% (in CpG sites with coverage  $> 60$ ) for 5-hmC status between biological replicates in NPC (Supp Fig 1D). For practical purposes, this may be considered as an approximate upper bound of possible predictive accuracy when evaluating 5-hmC status predictions.

Further we looked at consistency of our BS-seq and TAB-seq datasets in NPC. MLML (Qu, J., et al. 2013) is a method that uses read counts from data obtained by TAB-seq (or oxBS-seq), and BS-seq; to estimate CCRs for the 5-mC and 5-hmC modifications jointly. It identifies indices exhibiting "overshoot" where the sum of estimated CCRs for 5-mC and 5-hmC sum to greater than 1. Upon running MLML on our BS-seq and TAB-seq datasets in NPC we obtained the maximum likelihood distribution of 5-mC levels (Supp Fig 1E) that strongly resembled the one of BS-seq levels (Supp Fig 1A). Additionally, out of the 52,531,101 CpG sites being analyzed (sites without coverage in either of the experiments are discarded) the number of overshoot indices was only 3,186 or 0.006% in NPC. Most of the overshoot indices contained very low coverage (2,654 CpG sites) in both BS-seq and TAB-seq experiments and were systematically discarded prior to training our model.

### S3. Design decisions for training and testing the SVM and Random Forest

*SVM model decisions:* The parameters used to train the SVM are as follows: kkt violation fraction = 0.05, maximum number of sampled training sets used for training in order to achieve SVM convergence = 3, maximum number of iterations in each

training for SVM convergence =  $10^7$ . The average number of support vectors per 8000 training examples within different BS-seq optimal feature sets varied between 1200-1300, suggesting an upper bound of the experimental error rate range of 0.15-0.1625.

*RF model decisions:* When training the RF, we randomly sample one third of all available features in the training set, and perform sampling of training data-points with replacement. Splitting on input features is performed in a way that minimizes Gini Impurity score. Depending on the prediction paradigm we grow between 50 and 150 decision trees in the forest (for example CGI methylation status predictions can be successfully performed using 50 decision trees: when classification error reaches its minimum). Additional information about different modes implemented in our toolkit can be found in Supp Table T2.

*Training and testing set sizes:* In order to evaluate the performance of our SVM and RF based predictive model we perform 5 fold cross-validation using balanced sets having 10,000 data points. The balanced sets are comprised of 5,000 positive and 5,000 negative examples, where 4,000 of each class are used for training and the remaining 1,000 of each class for testing. We discovered that the aforementioned design decisions govern the best trade-off between stably and accurately estimating prediction metrics versus computational time (Supp Figs 2A, 2B, Supp Table T12). We thus chose  $k=5$  for  $k$ -fold cross-validation on 10,000 sampled training examples (5,000 of each class) to balance out the trade-off between the testing set size. Namely, if  $k$  is too high the testing set size will be too small, and conversely if  $k$  is too small the training set size is too small and the number of experiments may not be enough to estimate the prediction performance. If  $k$  is too large, it is worth noting that using more than 20,000 data points to train the SVM may cause the MATLAB built-in function `svmtrain` to be very slow, which may effectively result in non-convergence from a practical point of view.

*Increasing label fidelity for training and testing samples:* We identified the sequencing depth required for cytosines used for training (inclusion in the training set) and evaluating (inclusion in the testing set) our models based on the minimum sequencing depth that would always distinguish unmethylated (or non-hydroxymethylated) cytosine from marginally methylated or hydroxymethylated (CCR of 0.5 or 0.09 for BS-seq and TAB-seq respectively) given representative sampling. Due to sampling variance at low sample sizes causing small sample sizes to often not be representative, we performed a non-parametric categorical test (Fisher's Exact Test) between categorical distributions where for one sample the CCR is zero, versus another sample where CCR of the marginally methylated or hydroxymethylated sample is faithfully represented in the sample. We perform this over a range of sequencing depths fixed for both samples to identify when Fisher's Exact Test is able to identify a statistically significant difference between the two samples. This was performed to ensure label fidelity of training and testing samples. For BS-seq datasets, we need to minimally differentiate between completely unmethylated cytosines with a CCR of 0 with respect to marginally methylated cytosines with a CCR of 0.5. Given representative sampling, the minimum sequencing depth at a cytosine required to differentiate between the cases is two. However, we find that for the Fisher's Exact Test, we get a statistically significant  $p$ -value ( $p \leq 0.05$ ) when sequencing depth for both samples is 10. In practice, for the SVM and RF models, both balanced set predictions and whole genome predictions were performed with cytosines where coverage  $\geq 20$ . We find that out of 56,434,896 annotated CpG cytosines, 50,379,832 have coverage  $\geq 20$  in H1, and 49,134,499 have coverage  $\geq 20$  in NPC, suggesting that even in datasets with high sequencing depth, between 11% and 13% of cytosines do not have satisfactory coverage depth and can

be imputed using DIRECTION. For the Reference Methylome predictor variable based predictions, and SVM model is compared with the Reference Methylome predictor, since sequencing depth  $\geq 20$  across all reference methylomes causes a large drop in the number of cytosines eligible for training and testing, a more modest sequencing depth constraint of  $\geq 5$  was used. Similarly, when Nearest Neighbor evaluations were performed, the more modest sequencing depth constraint of  $\geq 5$  was used in order to capture more cytosines in the evaluation process.

Additionally, Consensus Reference Methylome and Nearest Neighbor were introduced as input predictor variables into our toolkit, and cytosines with sequencing depth  $\geq 5$  were chosen for this purpose.

For TAB-seq datasets, we need to minimally differentiate between completely non-hydroxymethylated cytosines with a CCR of 0 with respect to marginally hydroxymethylated cytosines with a CCR of 0.09. Given representative sampling, the minimum sequencing depth at a cytosine required to differentiate between these cases is 20. We find that for the Fisher's Exact Test, we get a statistically significant p-value ( $p < \text{or } \sim 0.05$ ) when sequencing depth for both samples is 60. In practice, for the SVM model, both balanced set predictions and whole genome predictions were performed with cytosines where coverage  $\geq 60$ . See Supp Table T13A for p-values.

#### S4. Relevant metrics for evaluating classification of cytosine modifications

The metrics commonly used to assess the performance of a supervised learning algorithm belong to one of the following three categories: threshold metrics, rank metrics, or probability metrics (Caruana, R. and Niculescu-Mizil, A. 2006). Since we perform classification using non-likelihood based approaches (SVM and RF), we use appropriate metrics in the "threshold-based" metrics category. The decision of which one to choose mostly depends on the nature of the problem that needs to be addressed. For prediction of skewed classes, special care needs to be taken such that the metric does not get inflated by simply predicting one class more often than the other. Concretely, we perform both methylation and 5-hmC predictions using balanced sets (avoiding skewed classes) and report the performance using Precision, Recall, F-Score (harmonic mean of Precision and Recall), and AUC while whole-genome prediction performance (where the frequency of the two classes are skewed for both methylation and 5-hmC status prediction) is evaluated using True Positive Rate (Sensitivity or Recall), True Negative Rate (Specificity) and Accuracy. Evaluation metrics used in our analyses are formulated as follows:

1.  $Precision = \frac{TP}{TP+FP}$
2.  $Recall \text{ or Sensitivity or True Positive Rate} = \frac{TP}{TP+FN}$
3.  $Specificity \text{ or True Negative Rate} = \frac{TN}{TN+FP}$
4.  $Accuracy = \frac{TP+TN}{TP+TN+FP+FN}$
5.  $F - score \text{ or } F1 - score = \frac{2 * Sensitivity * Specificity}{Sensitivity + Specificity}$
6. AUC: Which is created by plotting the False Positive Rate (1-True Negative Rate) on the x-axis and the True Positive Rate on the y-axis, and the resulting area under the curve is calculated.

where TP=number of true positives, TN=number of true negatives, FP=number of false positives, and FN=number of false negatives.

AUC calculations were only performed for RF models due to the ease of ranking predictions using the MATLAB native random forest function.

#### S5. Feature preprocessing

We use a variety of genomic and epigenomic traits as input to train our classifier (Supp Table T3). Features we do not model include gene annotation because histone modification data implicitly contain this information and enable us to discern between active, poised, and repressed cis-regulatory (Ernst, J. and Kellis, M. 2012) and transcribed regions. Such annotation-based features may be incorporated when histone modification datasets are not available. Additionally, we do not model spatial contiguity explicitly into our predictive model. Since DNA methylation response variable (thresholded BS-seq CCRs) and various input features (e.g. histone modifications) are very well correlated spatially, our predictions are able to identify stretches of similar methylation without a need for explicit spatial auto-correlative models like Hidden Markov Model (HMM) or explicit spatial input features. TAB-seq CCRs are not spatially auto-correlated as well as BS-seq CCRs, but 5-hmC enriched regions and large stretches of 5-hmC depletion can be identified. Finally, features such as discriminative k-mers and motifs or ChIP-seq datasets of TF binding that can predict the methylation status were not used since the expression of such TFs are likely to be cell-type specific and accordingly not suitable for transfer learning purposes in the context of whole methylome reconstruction. Only the near ubiquitously expressed CTCF and p300 TF ChIP-seq data were used in the Initial Feature Set for predicting H1 methylation status, and these features were not used for NPC methylation status prediction, transfer learning for methylation status prediction, or 5-hmC status prediction.

All genomic features (tracks) such as Alu repeats, CGI as well as the genomic positions of CpG sites in the human genome (hg19 assembly) were obtained from the UCSC genome browser (Speir, M.L., et al. 2016), or calculated based on the downloaded sequence and annotation. Histone mark ChIP-seq, DNase-seq and Transcription Factor binding ChIP-seq data (CTCF, p300) were obtained from the Roadmap Epigenome consortium ([http://egg2.wustl.edu/roadmap/web\\_portal/processed\\_data.html](http://egg2.wustl.edu/roadmap/web_portal/processed_data.html)) (Kundaje, A., et al. 2015) under the NCBI GEO GSE16256 accession. Genome-wide signal coverage tracks (negative log<sub>10</sub> transform of the p-value) based on the uniformly processed Roadmap Epigenome Consortium datasets were used for ChIP-seq and DNase-seq features (Kundaje, A., et al. 2015). BS-seq and TAB-seq preprocessing is detailed in Supp Text S11. For 5-hmC status prediction, BS-seq CCR (and not the predicted methylated status) was used as an input feature. All the raw features were matched against the list of available CpG sites using the IntersectBed tool from the Bedtools toolkit (Quinlan, A.R. and Hall, I.M. 2010). After initial processing all the features were stored into a single matrix. The features were normalized to zero mean and variance=1 (also called standardization), before training the model (Bishop, C. 2007).

An additional feature was created for methylation status imputation based on the methylation status of the CpG cytosine nearest to the cytosine in question (nearest neighbor feature). However, a similar feature was not used for 5-hmC status imputation since 5-hmC modifications do not occur in long stretches even though they can be somewhat locally enriched. We find that the 5-hmC status of the nearest CpG cytosine has poor predictive ability when performing imputation (Supp Table T14).

#### S6. Recursive feature elimination and beam search pseudocode

Typically, machine learning models with more parameters tend to fit the response variable better, occasionally resulting in overfitting (Bishop, C. 2007). This leads to a trade-off between predictive power and feature sparsity. Some previous approaches to perform optimal feature selection include

dimensionality reduction (Zheng, H., et al. 2013), and removal of individual features from the full feature set to create the Gini index (Yan, H., et al. 2015, Zhang, W., et al. 2015) which will rank the features according to their contributions to the prediction metric. In order to gain additional insight about features and their additive effects we implemented a modified version of the recursive feature elimination algorithm that provides information about the discriminative nature of individual features and features subsets. Recursive feature elimination is a well established strategy that was successfully used to determine the most predictive features and feature sets for methylation prediction (Das, R., et al. 2006). However, performing a top-down exhaustive search given a high number of input features (N) can be extremely time consuming and computationally demanding since the number of explored feature sets may reach  $2^N - 1$ , leading us to consider heuristic approaches in determining the OFS. Our recursive feature elimination algorithm is implemented using beam search:

**BeamSearch**(beam width  $b$ , Initial Feature Set  $I$ , cross-validation fold  $k$ , maximum number of iterations  $m$ , number of top feature sets returned  $t$ )

```

fit and test models on Initial Feature Set  $I$  on training data using  $k$ -fold cross-validation;
calculate evaluation metric score  $e_I$  by comparing predictions and known labels;
update list of top optimal feature sets  $L$  based on evaluation;
initialize priority queue  $Q$  with feature set  $I$  using priority  $e_I$ ;
initialize number of evaluations  $n$ ;
while ( $Q$  is not empty AND  $n <$  maximum number of iterations  $m$ )
{
     $S$  = feature set dequeued from head of  $Q$  having highest priority;
    for each feature  $f$  in  $S$ 
    {
        initialize candidate feature set list  $C = \{ \}$ ;
         $S^* = S - \{ f \}$ ;
        if ( $S^*$  has not been evaluated previously)
        {
            fit and test models on feature set  $S^*$  on training data using  $k$ -fold cross-validation;
            if (model converges on training)
            {
                calculate evaluation metric score  $e_{S^*}$  by comparing predictions to known labels;
                update list of evaluated feature sets  $L$  with ( $S^*$ ,  $e_{S^*}$ );
                add ( $S^*$ ,  $e_{S^*}$ ) to candidate feature set list  $C$ ;
                increment  $n$ ;
            }
        }
    }
    sort  $C$  based on evaluated metric scores;
    choose the top  $b$  (beam width) feature sets with highest evaluation metric scores from  $C$  and enqueue into priority queue  $Q$  using evaluated metric score as priority;
}
}
sort  $L$  based on evaluation metric score and return top  $t$  feature sets

```

An integrated picture of Initial Feature Set selection and the identification of the OFS using beam search is shown in Supp Fig 3D.

### S7. Initial elimination of redundant features before beam search

We identified and eliminated redundant features based on feature clustering and reduced the size of the full feature set, and ultimately created the “Initial Feature Sets” (IFS) (Supp Table T15). We identify clusters of highly correlated features and keep only one representative feature for each cluster and eliminate the others. The total set of predictor variables include several features that were engineered at multiple genomic resolutions (in bins of 50bp, 100bp, 200bp, 400bp, and 800bp) to predict DNA methylation and hydroxymethylation in genomic regions of corresponding size, and these naturally cluster in redundant groups. Since DIRECTION is trained to classify methylation and 5-hmC status at single nucleotide resolution, engineered features at the smallest resolution (50bp) were kept for the IFS, and the lower resolution features were discarded. These decisions resulted in saving a reasonable amount of computational time, and significantly reduced the possibility of overfitting our model (Supp Fig 3D).

### S8. Characterization of feature subset contributions to predictive ability of the OFS

While creating the IFSs eliminated highly correlated features, OFSs identified by the beam search algorithm can still contain somewhat correlated, partially redundant features. For performance issues, we want to have some degree of redundancy in the OFS to make the prediction robust, but on the other hand we want to also assess the contribution to the predictive ability by subsets of features in the OFS. We thus performed the following assessment. We performed a standardization (Z-transformation (Bishop, C. 2007)) across all features and hierarchically clustered them to identify similarity across features. Based on the feature clustering in the OFS, we left out individual features and feature subsets according to the nodes of the dendrogram, and retrained our classifier. The difference in performance metrics with respect to the OFS provides a clear indication of both feature redundancy and contributions of subsets of features to the OFS prediction metric.

While max-margin models do not explicitly possess a likelihood-based inferential framework to directly apply information theoretic approaches to sparse model selection like the Akaike Information Criterion (Bishop, C. 2007), our approach provides an intuitive platform to identify smaller subsets of the OFS having comparable predictive power, and also identifies subsets of features that have major contributions to the precision and recall (Fig 4C and Supp Figs 2C, 2D).

The notion behind identifying a “minimal” feature set was based on the notion of several correlated input features potentially being part of the OFS, each only contributing a limited amount of predictive power to the overall OFS. By clustering the individual features in the OFS and eliminating them one at a time, we identified the effect each (or a subset) possesses on the predictive power, in a manner agnostic to the classification algorithm. The tradeoff between obtaining a smaller feature set versus improving classification performance metrics can thus be clearly identified, allowing the user to decide on a choice of the input feature set for related experiments.

### S9. Predictive power of neighboring CpG sites

Since the predictive power of neighboring CpG sites drops with distance, we wanted to determine what fraction of CpG sites with low coverage ( $< 5$ ) has high coverage ( $\geq 5$ ) neighboring CpG sites within 500bp, making them a good candidate for imputation. To answer this question, we computed the Cumulative Distributive Function (CDF) of the fraction of low coverage sites with respect to distance to the nearest high coverage neighboring site (Fig 3D), in high coverage (NPC) and low coverage (Fetal Small Intestine) Roadmap Epigenome consortium datasets. Even in a low coverage methylome such as Fetal Small Intestine (Supp Fig 3B), more than 60% of low coverage CpG sites had a corresponding high coverage neighbor within 500bp, suggesting high probability of them being correctly imputed (Fig 3C).

### S10. Defining a consensus reference methylome

The high predictive ability of DNA methylation predictors by using only sequence derived features (in multiple datasets) suggests that a portion of DNA methylation status in CpG sites is governed by the underlying sequence, and should be unchanged across tissue and cell types and across conditions. By utilizing the concept of similar methylation status across different tissues, we identified the regions of invariant methylation and implemented it into our prediction framework. We obtained 25 publicly available cell line and tissue WGBS datasets (Supp Table T9B) from the Roadmap Epigenome consortium excluding H1 and H1-derived cells, estimated its methylation status by thresholding the CCR at

0.5 for each cytosine, and compared the respective binary methylation statuses (high and low methylation) across all the CpG sites (with coverage  $\geq 5$  for all 25 reference methylomes not based on the H1 lineage).

### **S11. DNA methylation and hydroxymethylation data sourcing and performance of DIRECTION for different BS-seq CCR values**

#### *DNA methylation and hydroxymethylation data sourcing:*

Traditionally, Next Generation Sequencing (NGS) techniques require either a *de novo* assembly of the sequenced reads or mapping the reads to a known reference genome. Various tools like BSMAP, RMAP, BS-Seeker, and BISMAR (Guo, W., et al. 2013, Krueger, F. and Andrews, S.R. 2011, Smith, A.D., et al. 2009, Xi, Y. and Li, W. 2009) perform end to end mapping analysis or build “wrappers” around state-of-the-art generic NGS read mapping tools like Bowtie (Langmead, B. and Salzberg, S.L. 2012) for this purpose. Typically, most such methylation calling strategies use a filtering scheme to count bases with high quality sequencing and alignment scores, followed by a simple binomial probability test (Yu, M., et al. 2012). We have devised the pipeline for end to end mapping and variant calling of raw BS-seq and TAB-seq reads using the BISMAR BS-seq read mapper (Krueger, F. and Andrews, S.R. 2011). Scripts that were used to calculate the reads sequencing depth and hydroxymethylation levels were `coverage2cytosine` and `bismark methylation extractor`. The final output to the `.bed` format was performed by the `bismark2bedGraph`. This was performed to generate H1 and NPC TAB-seq CCRs. H1, NPC, MSC, and IMR90 BS-seq CCRs were obtained from the uniformly processed datasets of the NIH Roadmap Epigenome Consortium ([http://egg2.wustl.edu/roadmap/web\\_portal/processed\\_data.html](http://egg2.wustl.edu/roadmap/web_portal/processed_data.html)) processed from GEO series GSE16256 datasets by the Consortium as fractional methylation value and read coverage for each CpG cytosine.

*Performance of DIRECTION for different BS-seq CCR values:* We analyzed the results for whole methylome predictions in H1 and NPC by binning all high-coverage cytosines (sequencing depth  $\geq 20$ ) in the BS-seq datasets based on their CCRs. We created 5 bins, based on intervals of 0.2 from 0 (completely unmethylated) to 1 (completely methylated) based on the CCR. We find that for the SVM model (tested on the H1 dataset) and the RF model (tested on the NPC dataset), our accuracy for the extremal values of BS-seq CCRs are accurate (Supp Figs 2I, 2J, respectively, Supp Table T6), while the performance is limited in the interval [0.4, 0.6] corresponding to intermediate methylation. This suggests that cytosines in these regions correspond to data points near the classification boundary, and are prone to be misclassified due to their proximity to the boundary. However, intermediate methylation is relatively uncommon in *in vitro* cell lines due to their homogeneity, and in mammalian systems (H1 and NPC:  $<3\%$ , (Zeng, J., et al. 2012a)). Thus, we find that the lower predictive ability of DIRECTION in cytosines with intermediate methylation only has a modest effect on the overall prediction metric by contrasting precision and recall in balanced sets sampled from the methylome by including or withholding cytosines with intermediate methylation (Supp Figs 2K, 2L). For datasets with significantly higher amounts of intermediate methylation, we recommend using regression based approaches (Zhang, W., et al. 2015).

### **S12. Additional discussion on OFS feature contributions to DNA methylation status prediction and transfer learning**

*OFS feature contributions to DNA methylation status prediction:* We discovered that DNase and histone state features impacted the recall in CGI regions significantly,

whereas high precision values were predominantly governed by H2AK5ac histone modification, known to be associated with regions of active chromatin and insulator region shores (Wang, T., et al. 2012). Similarly, if any of the aforementioned features or the clusters they belong to are removed, the DNA methylation prediction in non-CGI regions drops (Supp Fig 2D), suggesting similar informational content of predictors in CGI and non-CGI OFSs. In summary, a small set of features (H3K4me3; either DNase or Histone states; and H2AK5ac, along with Repeats for Non-CGI regions) can near optimally predict methylation status at single nucleotide resolution.

Many aspects of our learned models are consistent with previous findings: a significant gain in prediction accuracy when highly discriminative epigenomic features are included (Figs 2B and 2C) (Yan, H., et al. 2015), and significantly improved prediction performance in CGI regions with respect to non-CGI regions.

*Transfer learning:* Successful transfer learning between two cell types requires that a set of discriminative features and its associated model decision boundary in one cell type, also have comparable predictive power in the other. In order to identify methylomes that are significantly dissimilar with respect to H1 and NPC, we performed clustering for all reference methylomes in the Roadmap Epigenome Consortium datasets (top eight principal components accounting for 81% of variation in the data, Euclidean distance measure and average linkage were used, Supp Fig 3C). We chose to use the methylomes for Mesenchymal Stem Cells (MSC), and fetal fibroblast cell line IMR90, which show distinct divergence from the H1 and NPC methylomes. We analyzed the predictive performance for the NPC-trained predictive model on H1, MSC, and IMR90 methylomes.

We find that H1 predictions using the NPC-trained model are comparable to the NPC whole methylome predictions. The metrics for the MSC cell line (totipotent, but nearly terminally differentiated) are still fairly accurate (TPR: 0.87, TNR: 0.71, Accuracy: 0.85) (Supp Table T6). However, we find that for the terminally differentiated IMR90, the metrics for the predictions are very modest (TPR: 0.86, TNR: 0.23, Accuracy: 0.69) (Supp Table T6). This suggests that transfer learning only works within similar methylation paradigms, where the relationship between methylation and discriminative input features are similar. Given that the methylation profile and prevalence in stem cells and terminally differentiated cells are very distinct, we find that such transfer learning is not feasible.

NB: For evaluating IMR90, the sex chromosomes were left out during evaluation, as IMR90 is a female cell line, as opposed to H1, NPC, and MSC.

### **S13. BS-seq driven 5-hmC status identification**

There is a vast number of BS-seq datasets which are publicly accessible, and only a handful of these have an accompanying TAB-seq counterpart. We used the NPC BS-seq and TAB-seq datasets to train and test a 5-hmC status prediction classifier using only CpG sites where BS-seq CCR could be reliably estimated (coverage  $\geq 20$ ). We trained our model using the 5-hmC OFS, where the BS-seq level feature was excluded. Such a classifier performs comparably to our previously reported classifiers, achieving a precision of 0.74, recall of 0.8 and an F-score of 0.77 (Supp Table T10). Hence, we show that our method has the capability of performing *de novo* 5-hmC modification map reconstruction based on the BS-seq dataset and a handful of other features. Such an approach trades off the size and diversity of the training data for a smaller, higher quality training set, and can likely be useful in reconstructing 5-hmC maps of experimental conditions with published BS-seq data.

### **S14. Enhancer identification**

The ChIP-seq H3K27ac raw SRA file for calling enhancer regions in NPC was obtained under the accession

(GSM818031). Raw SRA files were mapped to the reference human hg19 genome using Bowtie2 to create the bam file. The obtained bam file was used as an input to the enhancer calling tool ROSE (Whyte, W.A., et al. 2013).

### **S15. 5-hmC prediction feasibility in enhancers for reduced representation datasets**

Simulations were performed in enhancer regions to create downsampled TAB-seq datasets. The overall number of TAB-seq reads (approx. 84,000,000) were downsampled to different downsampling levels (75, 50, 25, 12, 5, 1 percentage of original-not all shown) (Fig 5A). A linear regression was used to fit the number of reads mapping to the enhancer to the sum of sequencing depth (Fig 5B) across all cytosines in it. 25 downsampling operations for each downsampling level were performed, and the obtained variance was low as shown in the box plot (Fig 5A). The histogram was divided into 3 categories: low, medium and high sequencing depth. Enhancers with the sum of cytosine sequencing depths  $> 60$  were regarded as high, based on the Fisher test obtained  $p$ -value  $< 0.05$  for discriminating against high and low hydroxymethylation coverage (Supp Table T13A).

As shown in Fig 5A, downsampling to 5% of the total number of reads still leaves more than 10,000 enhancer regions with the sum of cytosine sequencing depths ( $\geq 60$ ) and over 2,000 cytosines with individual sequencing depths  $\geq 20$  (corresponding to our sequencing depth levels required for assigning class labels, (details on filtering training data based on sequencing depth in Supp Text S1) which suffices for the purpose of training our classifier at the resolution of individual enhancers. The downsampling size of 12% contains  $\sim 10$  million reads, which corresponds to the amount of RRBS-seq reads obtained in previous studies (Bock, C., et al. 2010, Chatterjee, A., et al. 2012). This suggests that even for RRBS-seq datasets, it is possible to train a model to successfully reconstruct the hydroxymethylome in enhancer regions.

### **S16. 5-hmC enrichment ratio calculation**

Unlike DNA methylation status, hydroxymethylation status cannot be successfully imputed using neighboring CpG site information (Supp Table T14), suggesting that CpG sites of similar hydroxymethylation status do not occur in as frequent and long stretches as similarly DNA methylated CpG sites. Hence, we devised a metric for identifying 5-hmC enrichment in a given genomic region. We used this to identify 5-hmC enrichment in enhancers.

GTF hg19 files were obtained from UCSC Genome Browser (Speir, M.L., et al. 2016), and further intersected with an available list of annotated enhancers (Supp Data 1 on the tool website). The regions that contained less than 10 CpG sites upon intersecting with enhancer and gene annotations were discarded from analyses.

We define the ratio of the number of 5-hmC modified cytosines to the sum of 5-hmC and 5-mC modified cytosines in an enhancer as the 5-hmC enrichment ratio. We performed calculation of 5-hmC enrichment ratio in the intragenic enhancer regions, using 5,000bp sliding windows spanning intragenic enhancers. 5-hmC enrichment ratio in a given region is defined as the ratio of the number of cytosines with 5-hmC modification to the number of cytosines with 5-hmC or 5-mC modification. This may be estimated using BS-seq data, or based on SVM predictions. Genes depicted in Fig 5C were sorted based on the gain of 5-hmC enrichment ratio in intragenic enhancers in NPC vs H1 (Supp Data 2, Supp Data 3 on the tool website).

### **S17. Gene ontology analysis**

Gene sets that were used in gene ontology analysis were previously sorted based on the criteria described in the results section. We performed our analysis using the DAVID gene ontology toolkit (Huang, D.W., et al. 2009) using Gene Ontology database (The Gene Ontology Consortium. 2017)

biological processes. The first 500 gene or pseudogene entries were used as input to DAVID to calculate the GO terms related to 5-hmC enrichment ratio in intragenic enhancer regions. Pseudogene entries were discarded by DAVID. All of the included GO terms had Benjamini corrected  $p$ -value  $< 0.05$  Supp Data 2, Supp Data 3 on the tool website).

### **S18. Strengths, limits and relevance of DIRECTION**

*Use of DIRECTION in reduced representation datasets:* Both BS-seq (Meissner, A., et al. 2005) and TAB-seq (Plongthongkum, N., et al. 2014) protocols have reduced representation versions where assays query a limited set of CpGs. DIRECTION is ideally suited to impute methylation or hydroxymethylation status in such reduced representation datasets (as well as existing low coverage whole genome datasets), being able to make use of relevant genome-wide traits (based on genomic annotation, DNA sequence and relevant publicly available genome-wide assays) to create whole-genome scale datasets.

*Starting point for 5-hmC functional studies:* One of the key differences that sets DIRECTION apart from other predictors is the ability to predict 5-hmC modifications. 5-hmC modifications are known to be cell-type or developmental stage specific (Wang, T., et al. 2012), and hence *in silico* detection of differentially hydroxymethylated regions can be performed by integrating reduced representation datasets and available genomic and epigenomic traits using DIRECTION. *In silico* detection of such differentially hydroxymethylated regions (as we show in H1 and NPC) can be the starting point of deeper functional studies in such regions.

*5-hmC status prediction and correlative studies:* The molecular mechanisms underlying 5-hmC creation and potential maintenance in the genome, its stability and regulatory potential, are presently all subject to a lot of scientific debate (Hahn, M.A., et al. 2014, Shen, L. and Zhang, Y. 2013). As we have shown, DIRECTION is capable of testing predictive powers of different sets of genomic and epigenomic features with respect to 5-hmC status prediction. Such correlative studies, in conjunction with perturbation models, can lead to a better understanding of 5-hmC.

*Potential for use in oxBS-seq datasets:* The oxBS-seq protocol (Booth, M.J., et al. 2012) allows for positive readouts of 5-mC modifications (as opposed to 5-hmC modifications in TAB-seq experiments). As future work, we will consider additional experiments to train a model for directly predicting 5-mC modifications. However, likelihood based models like MLMML (Qu, J., et al. 2013) can integrate datasets from any two of BS-seq, oxBS-seq and TAB-seq datasets, to estimate CCRs for the third. Estimated CCRs for TAB-seq or BS-seq datasets generated in this fashion can then be used for analysis in DIRECTION.

*Limits of transfer learning using DIRECTION:* Transfer learning for the purposes of prediction requires that the set of input features used for prediction in the source dataset, are discriminative in the target dataset and have similar correlational structure (Pan, S.J. and Yang, Q. 2010). While an in-depth analysis of transfer learning for methylation prediction is beyond the scope of this paper, we used the NPC-trained methylation prediction SVM to predict the methylome in H1, MSC and IMR90. Based on our NPC-trained SVM's performance in the whole genome NPC dataset, we find drops in accuracy in the pluripotent H1 (7% decrease) and near-differentiated, totipotent MSC cell lines (11% decrease). However, the accuracy for the NPC-trained SVM in the terminally differentiated IMR90 cell line drops by over 25%, suggesting that the OFS and SVM decision boundary for NPC is not suited for predicting the IMR90 methylome. Such results are in agreement with studies showing large-scale epigenetic reprogramming during differentiation (Teif, V.B., et al. 2014) that likely cause a change in the correlational structure between the input features and the response variable



(DNA methylation status). The limited number of input features in the OFS used by DIRECTION, while practical, does not lend itself to transfer learning in such scenarios. However, transfer learning is potentially feasible in closely related cell types or conditions where methylation paradigms remain unchanged.

*Tradeoffs underlying classification frameworks for methylation prediction:* DNA methylation is essentially a discrete phenomenon at the level of individual alleles. Hence, methylation prediction lends itself naturally to a classification framework. However, bisulfite-based sequencing assays typically agglomerate signal from both alleles across millions of cells, giving rise to CCRs that may be closer to 0.5 (intermediate methylation) than 0 or 1 (completely unmethylated or methylated). Classification algorithms excel at predicting methylation status in cytosines with CCRs that have extremal values (near 0 or 1). However, their performance degrades for predicting methylation status in cytosines with CCRs commensurate with intermediate methylated levels due to the near-arbitrariness of class label assignments for such intermediate CCRs. DIRECTION is designed for predicting methylation and hydroxymethylation at CpG cytosines in mammalian genomes, which are well known to show a bimodal distribution of CCRs even in highly heterogeneous mammalian tissues like muscle (Couldrey,C., et al. 2014) and brain (Zeng,J., et al. 2012b). However, some mammalian datasets can possess some intermediate methylation (Lister,R., et al. 2009). Cancer datasets, with their underlying mixture of cell-types and genome heterogeneity, can be a source of such intermediate methylation in mammals (Ahn,J.B., et al. 2011). Additionally, for invertebrates, the degree of intermediate methylation is known to be higher (Elango,N. and Yi,S.V. 2008). For such situations, a regression based approach is possibly more suitable (Zhang,W., et al. 2015). Given the flexibility of our learning framework, such regression-based predictors can be incorporated into our learning framework if needed.

*Relevance of in silico prediction:* Widespread use of epigenome-querying assays like BS-seq naturally leads to a discussion of relevance of *in silico* epigenome prediction. However, for an *in vivo* sourced sample with a limited DNA yield (like clinical samples), only a few assays can be performed, necessitating the *in silico* prediction of some assays based on the outcome of others. Secondly, paralleling the rise of whole genome assays, are reduced representation BS-seq (Meissner,A., et al. 2005) and TAB-seq (Plongthongkum,N., et al. 2014) assays, for which *in silico* prediction is especially relevant. Recent developments in single cell technologies allow BS-seq assays to be performed on individual cells (Kantlehner,M., et al. 2011), with some studies contemplating single-cell TAB-seq as future work (Guo,H., et al. 2013). Given the destructive nature of next generation sequencing, *in silico* prediction tools can be potentially useful for using single-cell methylation data and underlying genomic sequence to make a model-based prediction for 5-hmC status, or for imputing methylation status.

## Supplementary Figures and Captions

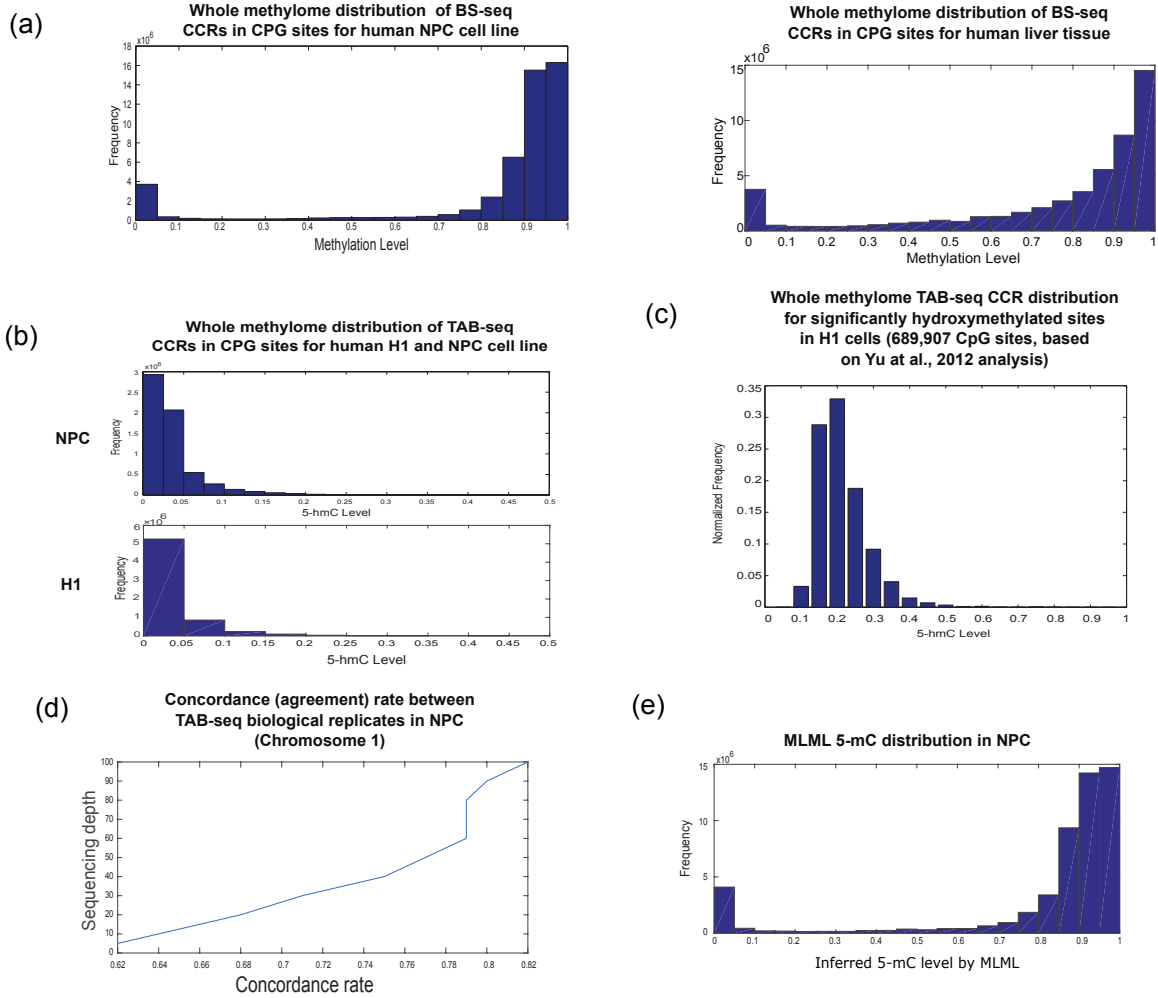

**Supplementary Figure 1:** (a) Empirical distributions of methylation levels in NPC and liver tissue. (b) Distribution of hydroxymethylation levels in H1 and NPC. (c) Distribution of 5-hmC levels in the set of CpG sites identified as significantly hydroxymethylated in (Yu, M., et al. 2012). (d) Concordance rate between NPC replicates as a function of minimum depth of mapping at either replicate. (e) Inferred 5-mC level distribution in NPC by the tool MLML (Qu, J., et al. 2013) by jointly analyzing BS-seq and TAB-seq CCRs.

### Machine learning framework for DNA hydroxymethylation prediction

(A) Dependence of performance metric (F-score) on training set size (NPC CGI dataset)

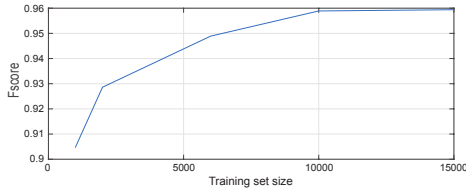

(B) Dependence of performance metric (F-score) on testing set size (NPC CGI dataset)

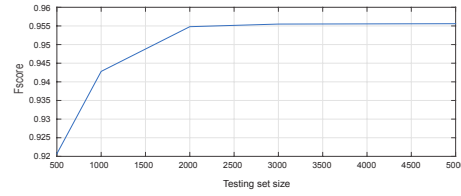

(C) Exclusion of features from optimal feature set and effect on precision and recall (NPC CGI dataset)

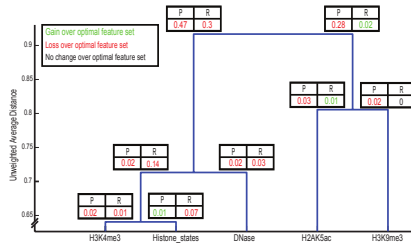

(D) Exclusion of features from optimal feature set and effect on precision and recall (NPC non-CGI dataset)

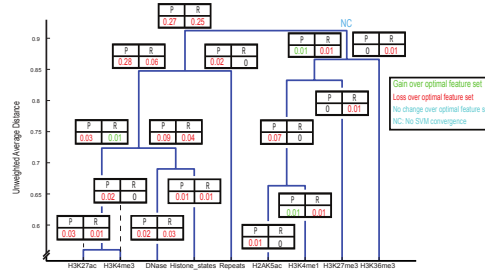

(E) DNA methylation prediction in H1 CGI dataset for balanced sets

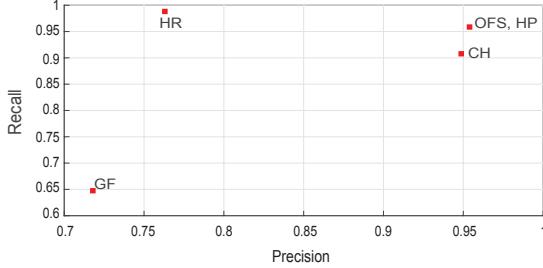

OFS : Optimal Feature Set  
HP : High Precision  
HR : High Recall  
CH : Core Histones  
GF : Genomic Features

(F) DNA methylation prediction in H1 non-CGI dataset for balanced sets

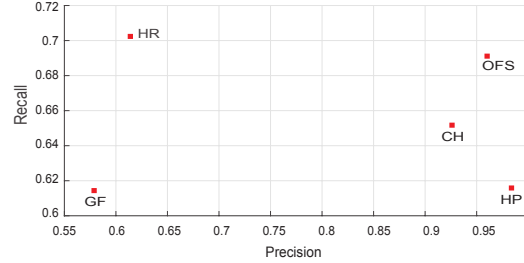

(G) Area under curve for DNA methylation prediction in NPC CGI dataset for balanced sets

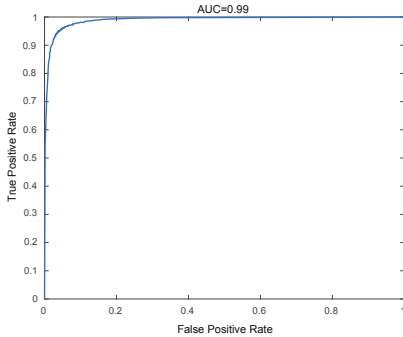

(H) Area under curve for DNA methylation prediction in NPC non-CGI dataset for balanced sets

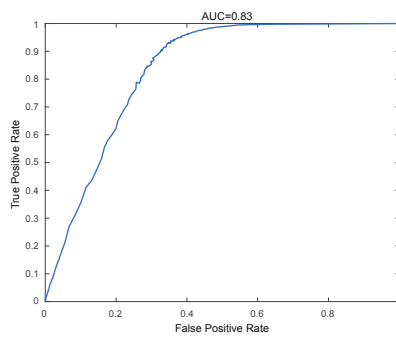

(I) Whole genome BS-seq status prediction accuracy in H1 across different BS-seq level values (5 bins)

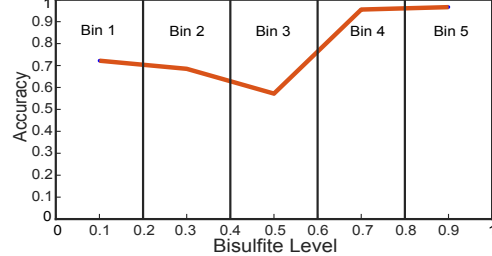

(J) Whole genome BS-seq status prediction accuracy in NPC across different BS-seq level values (5 bins)

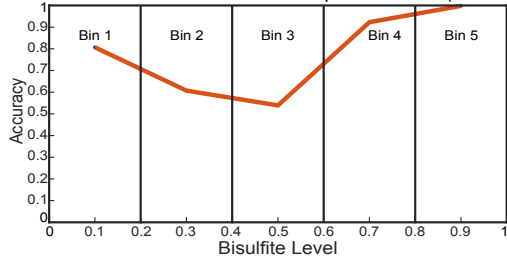

(K) Balanced sets BS-seq status prediction based on inclusion and exclusion of Intermediate Methylation (IM) in CGI

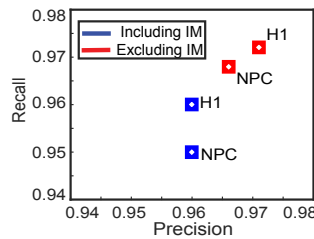

(L) Balanced sets BS-seq status prediction based on inclusion and exclusion of Intermediate Methylation (IM) in Non-CGI

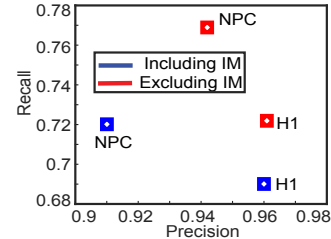

**Supplementary Figure 2:** (A, B) F-score trajectories with increase of training (A) and testing (B) set size for SVM classification on balanced sets in NPC for DNA methylation status. (c, d) Hierarchical clustering of features in OFS for predicting methylation status in NPC CGI (C) and non-CGI (D) regions, and corresponding changes in precision and recall with respect to OFS (E, F) Prediction metrics for DNA methylation status prediction in H1 cells CGI (E) and non-CGI (F) regions. (G, H) AUC curves for DNA methylation status predictions in NPC CGI (G) and NPC non-CGI (H) regions. (I, J) Methylation status prediction accuracy obtained by binning the whole genome based on the BS-seq level in H1 (I), and NPC (J). (K, L) Balanced sets predictions in H1 and NPC based on exclusion and inclusion of intermediate methylation [0.4 0.6] in CGI (K), and Non-CGI (L).



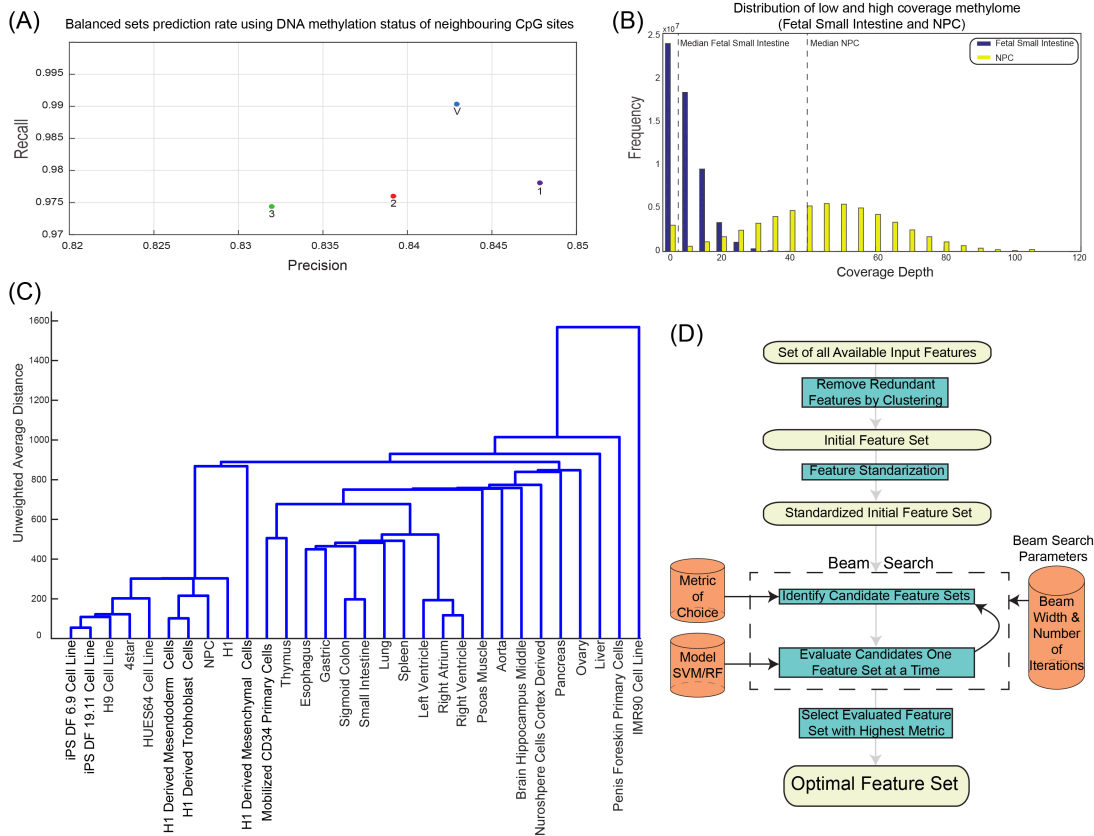

**Supplementary Figure 3:** (a) Precision/Recall plot for prediction of DNA methylation status using the methylation status of the 1<sup>st</sup>, 2<sup>nd</sup>, and 3<sup>rd</sup> nearest neighbor, and a vote amongst all three. (b) Empirical distributions of high coverage methylome such as NPC (yellow) and low coverage methylome such as Fetal Small Intestine (blue) (c) Hierarchical clustering of reference methylomes from the Roadmap Epigenome Consortium depicting distinctive methylation profile of IMR90 with respect to H1 and NPC cell lined (d) Schematic representation of optimal feature set finding algorithm embedded within DIRECTION.

(a) 5-hmC predictions in enhancer regions on balanced sets in NPC

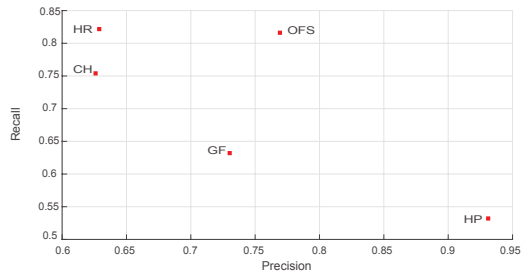

(b) 5-hmC predictions on balanced sets in H1

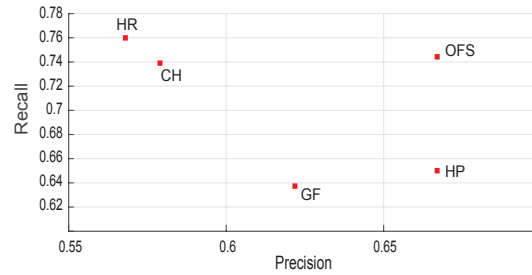

(c) Prediction metrics for H1 5-hmC whole methylome analysis

| Prediction Metric  | H1 5-hmC Whole Genome |
|--------------------|-----------------------|
| True Positive Rate | 0.67                  |
| True Negative Rate | 0.75                  |
| Accuracy           | 0.75                  |

(d) NPC TAB-seq (CCR threshold 0.09)

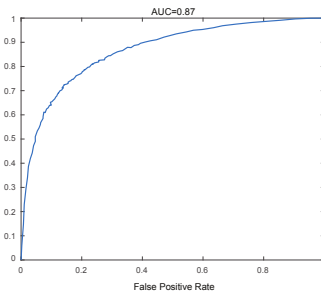

(e) NPC TAB-seq (CCR threshold 0.25)

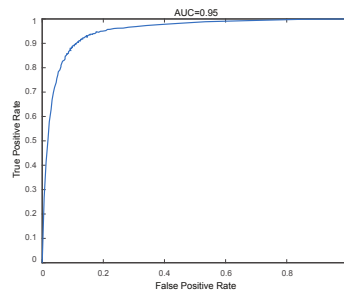

(f) NPC TAB-seq enhancers

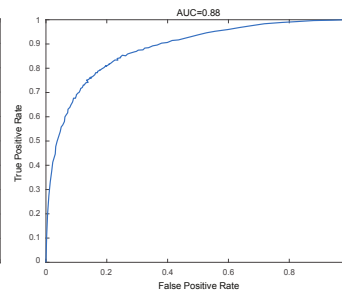

(g) 5-hmC prediction performance in NPC using various TAB-seq level thresholds

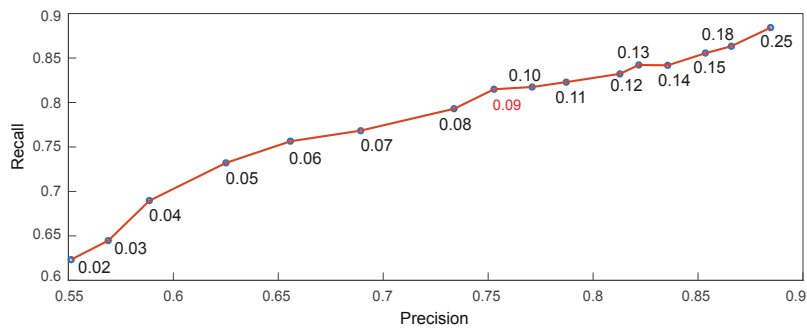

**Supplementary Figure 4:** (a) Precision/Recall plot for 5-hmC status predictions in NPC in enhancer regions using balanced sets for SVM. (b, c) Precision/Recall plot for 5-hmC status predictions in H1 in balanced sets (b) and whole genome (c) for SVM. (d) ROC curve for 5-hmC status predictions in NPC RF model. (e) ROC curve for 5-hmC status predictions using threshold of 0.25 in NPC RF model. (f) ROC curve for 5-hmC predictions in enhancer regions in NPC RF model. (g) Precision/Recall plot for 5-hmC status predictions in NPC using various 5-hmC level thresholds for SVMs. Threshold of 0.09 is marked red to symbolize the default value that was used in this paper (Underlying data: Supp Table T13B).

**Machine learning framework for DNA hydroxymethylation prediction**  
**Supplementary Tables**

| Citations                   | Samples                                                                                                                                                    | Model                                                            | Features                                                                                                                                                                                                                                                                                | Response variable                                                                                                          | Performance metric                                                                                               |
|-----------------------------|------------------------------------------------------------------------------------------------------------------------------------------------------------|------------------------------------------------------------------|-----------------------------------------------------------------------------------------------------------------------------------------------------------------------------------------------------------------------------------------------------------------------------------------|----------------------------------------------------------------------------------------------------------------------------|------------------------------------------------------------------------------------------------------------------|
| (Feltus,F.A., et al. 2003)  | Restriction Landmark Genome Scanning for control fibroblast and DNMT1-overexpressed fibroblast cell lines                                                  | LDA                                                              | k-mer and consensus motifs in CGI                                                                                                                                                                                                                                                       | Methylation prone CGIs vs Methylation resistant CGIs for DNMT1 overexpression among unmethylated CGIs in controls          | ACC: 0.82                                                                                                        |
| (Bhasin,M., et al. 2005)    | MethDB (curated database of ~5,000 experimentally determined methylation of DNA fragments in species from plants to humans) <sup>1</sup>                   | SVM (best), ANN, NB, LR, k-NN, decision tree                     | Genomic features (binary sparse encoding of sequence)                                                                                                                                                                                                                                   | Methylation status of DNA fragments of 39bp                                                                                | SVM (polynomial kernel degree 6) metrics: ACC: 0.7506, MCC: 0.504, AUC: 0.82                                     |
| (Feltus,F.A., et al. 2006)  | Restriction Landmark Genome Scanning for control fibroblast and DNMT1-overexpressed fibroblast cell lines                                                  | LDA                                                              | Discriminative motifs in CGI obtained using MAST                                                                                                                                                                                                                                        | Methylation prone CGIs vs Methylation resistant CGIs for DNMT1 overexpression among unmethylated CGIs in controls          | ACC: 0.84                                                                                                        |
| (Bock,C., et al. 2006)      | Methylation status of CGI in the non-repetitive parts of human Chromosome 21 (HpaII-McrBC PCR method)- 149 CGIs <sup>2</sup>                               | SVM linear kernel (best), RBF SVM, Decision tree, AdaBoost       | k-mer and nucleotide content, predicted DNA structure, repeat regions, TFBS, evolutionary conservation, SNP frequency                                                                                                                                                                   | CGI methylation status for whole CGI                                                                                       | Linear SVM metrics: CC:0.74, ACC:0.915                                                                           |
| (Das,R., et al. 2006)       | Human brain data <sup>3</sup> with methylation status of ~5,500 genomic domains                                                                            | SVM RBF kernel (best), K-means, LDA, LR                          | k-mer content and repeat regions                                                                                                                                                                                                                                                        | Methylation status of 800bp regions                                                                                        | RBF SVM metrics: ACC: Overall: 0.86, CGIs: 0.965, non-CGIs: 0.84                                                 |
| (Fang,F., et al. 2006)      | Human brain data <sup>3</sup> with methylation status of ~5,500 genomic domains                                                                            | SVM (linear kernel)                                              | Nucleotide and dinucleotide content, Alu element, TFBSs                                                                                                                                                                                                                                 | Methylation status of CpG-rich 200-500bp regions (CGI fragments)                                                           | ACC: 0.8303-0.8499, CC: 0.567-0.686                                                                              |
| (Kim,S., et al. 2008)       | Bisulfite treated tumor and normal human samples followed by targeted 454 sequencing of 25 gene-related CGIs                                               | NB (best), SVM (SMO), ANN, kNN (k=3)                             | 30bp flanking sequence of each CpG site                                                                                                                                                                                                                                                 | Methylation status of randomly selected 41 CpG sites from sequenced dataset (methylation level $\geq 0.5$ or $\leq 0.01$ ) | NB metrics: ACC:>0.75                                                                                            |
| (Bock,C., et al. 2007)      | Methylation status of CGI in the non-repetitive parts of human Chromosome 21 (HpaII-McrBC PCR method) <sup>2</sup>                                         | SVM (linear kernel)                                              | DNA sequence patterns, repeat distribution, predicted DNA helix structure, predicted TFBS, genetic variation, and CGI attributes                                                                                                                                                        | Methylation status of CGI                                                                                                  | CC: 0.698, ACC: 0.868                                                                                            |
| (Fan,S., et al. 2008)       | Human Epigenome Project <sup>4</sup> data for chromosomes 6, 20, and 22, using methylation status in human CD4+ T lymphocytes                              | SVM (linear kernel)                                              | Nucleotide content, Alu annotation, TFBS, and histone methylation (H3K4me1, H3K4me2, H3K4me3, and H3K9me1)                                                                                                                                                                              | CGI methylation status                                                                                                     | ACC: 0.8994                                                                                                      |
| (Carson,M.B., et al. 2008)  | Methylation status of CGI in the non-repetitive parts of human Chromosome 21 (HpaII-McrBC PCR method) <sup>2</sup>                                         | Alternative decision tree (best), decision tree, AdaBoost, SVM   | 4-mer frequencies in CGI                                                                                                                                                                                                                                                                | Methylation status of CGIs on chromosome 21                                                                                | Alternating decision tree metrics: ACC: 0.9063, AUC: 0.8906, MCC: 0.742                                          |
| (Bock,C., et al. 2009)      | Various vertebrate epigenomic datasets <sup>5</sup>                                                                                                        | AdaStump, Decision Tree, RF, NB, LR, SVM (linear, RBF kernels)   | DNA sequence content, predicted DNA structure, evolutionary history and population variation, annotation of repeats, genes, regulatory regions, chromosomal bands and isochores, histone modification                                                                                   | Prediction of various epigenetic features (including DNA methylation)                                                      | AdaStump metrics: for all epigenome predictions: CC: 0.498, ACC: 0.749                                           |
| (Previti,C., et al. 2009)   | Human Epigenome Project <sup>4</sup> data for chromosomes 6, 20, and 22, using methylation status for all samples, and Epigraph datasets <sup>5</sup>      | Decision tree (best), SVM                                        | Nucleotide content, evolutionary conservation, DNA structure prediction                                                                                                                                                                                                                 | CGI methylation status (2-way: methylated/unmethylated, or 4-way: methylation patterns across tissues)                     | Decision tree metrics: 2-way: CC:0.775, ACC: 0.9167; 4-way: CC: 0.707, ACC: 0.8939                               |
| (Lu,L., et al. 2010)        | Human Epigenome Project <sup>4</sup> data for chromosomes 6, 20, and 22, using methylation status in human CD4+ T lymphocytes                              | k-NN                                                             | 5-mer frequency in 499bp upstream and downstream of CpG site                                                                                                                                                                                                                            | Methylation status of CpG sites                                                                                            | ACC: 0.7745                                                                                                      |
| (Fan,S., et al. 2010)       | Human Epigenome Project <sup>4</sup> data for chromosomes 6, 20, and 22 across 1.9 million CpG sites, using methylation status in human CD4+ T lymphocytes | SVM (linear kernel)                                              | DNA sequence derived features: GC content, GC observed/expected ratio, Alu repeats, and repeat masker. 214 TFBS and 38 histone marks.                                                                                                                                                   | CGI methylation status in chromosomes 6, 20, and 22                                                                        | ACC: 0.94, CC: 0.81                                                                                              |
| (Zhang,W., et al. 2011)     | Human Epigenome Project <sup>4</sup> data for chromosomes 6, 20, and 22, using methylation status in human CD4+ T lymphocytes                              | SVM                                                              | Sequence length, nucleotide and dinucleotide content, promoter and TFBS annotation, nucleosome positioning                                                                                                                                                                              | Methylation status of CGI in chromosome 22                                                                                 | ACC: 0.9059, CC: 0.65                                                                                            |
| (Zhou,X., et al. 2012)      | MethDB (curated database of ~5,000 experimentally determined methylation of DNA fragments in species from plants to humans) <sup>1</sup>                   | SVM (RBF kernel)                                                 | 3-mer composition of DNA fragments                                                                                                                                                                                                                                                      | Methylation status and level for 400 human DNA fragments in MethDB                                                         | Methylation status prediction: ACC: 0.8207, MCC: 0.6411<br>Methylation level prediction: R: 0.8223, RMSE: 0.2042 |
| (Zheng,H., et al. 2013)     | Human Epigenome Project <sup>4</sup> data for chromosomes 6, 20, and 22, using methylation status in several human tissue or cell types                    | SVM                                                              | Gardiner-Garden criteria, 4-mer composition, conserved TFBSs and conserved elements, predicted DNA structure, functional annotation of proximal genes, nucleosome positioning, histone methylation and acetylation                                                                      | Methylation status of CGI                                                                                                  | Metric in human CD4+ lymphocyte: ACC: 0.9313, CC: 0.8302                                                         |
| (Gaidatzis,D., et al. 2014) | BS-seq for H1 and IMR90 cell lines                                                                                                                         | Linear regression                                                | Dinucleotide sequence derived features created using the sequence environment of 78bp. Each nucleotide interpreted as a categorical variable with 16 states.                                                                                                                            | DNA methylation levels at CpG nucleotides within partially methylated domains                                              | R=0.86 (for the sequence context of 140bp)                                                                       |
| (Ma,B., et al. 2014)        | Methylation array data of multiple human tissues                                                                                                           | Support vector regression (RBF kernel) (best), linear regression | Methylation beta values in surrogate tissue                                                                                                                                                                                                                                             | Methylation beta values for different tissues                                                                              | Methylation level prediction: For probes in beta-value range 0.2 to 0.8: R <sup>2</sup> : 0.89-0.98              |
| (Yan,H., et al. 2015)       | BS-seq for H1, NPC, IMR90 cell lines                                                                                                                       | RF (best), SVM (RBF kernel), LR, Decision Tree, NB               | Nucleotide composition, 16 histone marks, RNA-seq                                                                                                                                                                                                                                       | Methylation status of genomic segments (based on CpG_MPs tool)                                                             | RF metrics: H1: AUC: 0.99, NPC: AUC: 0.99, IMR90: AUC: 0.92                                                      |
| (Zhang,W., et al. 2015)     | 100 blood samples for 450K arrays                                                                                                                          | RF                                                               | Sequence composition, evolutionary rate, copy number variation, haplotype score, recombination rate, SNP presence, annotation of gene body, promoters, CGIs, repeats, DNase, Pol2 and TF ChIP-seq, histone marks, neighboring CpG site methylation level and distance, chromatin states | Methylation status and levels at single CpG sites                                                                          | Classification: CGI: ACC: 0.98, Whole genome: ACC: 0.92, Regression: R=0.9, RMSE=0.19                            |
| (Wang,Y., et al. 2016)      | GM12878 and K562 cell lines (RRBS-seq)                                                                                                                     | Deep Nets (ANN) and SVM                                          | Genomic features, neighboring CpG sites, and Hi-C                                                                                                                                                                                                                                       | Methylation status at CpG dinucleotides across 1kb windows                                                                 | ACC: 0.721-0.897                                                                                                 |
| (Fan,S., et al. 2016)       | BS-seq and methylation arrays for H1 and H9 cell lines                                                                                                     | RF (best), LR, SVM                                               | Nucleotide, dinucleotide frequencies and NpN ratios for 500bp flanks, methylation data for 1000bp flanks, histone marks, chromosome organization, chromatin structure, evolutionary features, repeats, TFBS                                                                             | Methylation status and levels at CpG sites                                                                                 | Metrics for RF: Classification: ACC: 0.93, MCC: 0.86, Regression: Spearman correlation coefficient: 0.7602       |

**Supplementary Table T1: Literature survey of methylation prediction** (Methods: NB: Naive Bayes, LR: Logistic Regression, k-NN: k Nearest Neighbor, RF: Random Forest, SVM Support Vector Machine, LDA: Linear Discriminant Analysis, ANN: Artificial Neural Network) (Metrics: ACC: Accuracy, MCC: Matthews Correlation Coefficient, CC: Correlation Coefficient, R: Regression Coefficient, RMSE: Root Mean Square Error) <sup>1</sup>(Amoreira,C., et al. 2003) <sup>2</sup>(Yamada,Y., et al. 2004) <sup>3</sup>(Rollins,R.A., et al. 2006) <sup>4</sup>(Eckhardt,F., et al. 2006) <sup>5</sup>(Bock,C., et al. 2009)

**Machine learning framework for DNA hydroxymethylation prediction**

| <b>Mode</b>          | <b>Description</b>                                                                                                                                                                                                                                                                                                                                                                                                |
|----------------------|-------------------------------------------------------------------------------------------------------------------------------------------------------------------------------------------------------------------------------------------------------------------------------------------------------------------------------------------------------------------------------------------------------------------|
| training             | This mode outputs a trained model (SVM or RF) for a given feature set, by sampling balanced sets from given input data                                                                                                                                                                                                                                                                                            |
| testing              | This mode performs testing to provide prediction metrics. It outputs the precision/recall metric on a testing data using user-specified previously trained model with feature set.                                                                                                                                                                                                                                |
| whole-genome         | This mode performs testing to provide predictions. It outputs the actual predictions of the model for a given input dataset, using user-specified previously trained model with feature set. It can be used to perform imputation, prediction limited to a certain set of genomic regions, or whole genome prediction.                                                                                            |
| cross-validation     | This mode samples balanced sets from the training data, partitions them into k sets for cross validation purposes, and performs testing for each partition, by training on the remaining partition, for a given feature set. It outputs precision/recall metrics across different test partitions, along with the associated model and feature set.                                                               |
| beam_search          | This mode takes as input an initial feature set, and training data. It performs beam search to identify the best feature set (a subset of the initial feature set) according to user specified prediction metric, and outputs the best feature set, trained model along with the metric. It also outputs all evaluated feature sets with respective metrics. It has the cross-validation mode embedded inside it. |
| bed_to_binary        | This mode is for database management. It takes as input multiple feature sets in bed format, and merges them together into 1 matrix and saves it in binary file (.mat binary MATLAB format) format. This ensures a consistent, compact input matrix which enhances overall computational performance.                                                                                                             |
| append_bed_to_binary | This mode is also for database management. It takes a single feature in .bed format as an input, appends it to a larger matrix in a user-specified .mat file and eventually updates the .mat binary file.                                                                                                                                                                                                         |

**Supplementary Table T2:** Summary of different modes in our epigenome prediction toolkit

| Feature                                                                                                 | Type                  | Description                                                                                                                                                                                                                                                                                                              | Motivation                                                                                                                  |
|---------------------------------------------------------------------------------------------------------|-----------------------|--------------------------------------------------------------------------------------------------------------------------------------------------------------------------------------------------------------------------------------------------------------------------------------------------------------------------|-----------------------------------------------------------------------------------------------------------------------------|
| <b>Genome-derived features (processed from UCSC Genome Browser datasets (Speir, M.L., et al. 2016))</b> |                       |                                                                                                                                                                                                                                                                                                                          |                                                                                                                             |
| CpG island (CGI)                                                                                        | Binary                | Presence/absence of CGI annotation at CpG site                                                                                                                                                                                                                                                                           | CGIs tend to be significantly unmethylated in comparison to non-CGI regions of the genome                                   |
| Distance to nearest CGI (in bps)                                                                        | Non-negative integer  | Helps distinguish CpGs in CGI, CGI “shores” and non-CGI                                                                                                                                                                                                                                                                  | Cytosines on the CGI shores (near CGIs) tend to be highly methylated and govern most of methylation within non-CGI regions) |
| Distance to nearest CGI (in CpGs)                                                                       | Non-negative integer  | Alternative feature for distance to CGI, measured in number of intervening CpGs, rather than genomic coordinates                                                                                                                                                                                                         | As above                                                                                                                    |
| GC content                                                                                              | Continuous<br>∈ [0,1] | Percentage of nucleotides which are G/Cs in centered window around CpG site (window sizes: 50, 100, 200, 400, 800bp used)                                                                                                                                                                                                | Higher GC content empirically shows lower methylation levels: fact corroborated in CGIs                                     |
| CpG density                                                                                             | Continuous<br>∈ [0,1] | Percentage of dinucleotides which are CpGs in centered window around CpG site (window sizes: 50, 100, 200, 400, 800bp used)                                                                                                                                                                                              | As above                                                                                                                    |
| Strand-specific guanine density                                                                         | Continuous<br>∈ [0,1] | Percentage of guanines in centered window around CpG site (window sizes: 50, 100, 200, 400, 800bp used)                                                                                                                                                                                                                  | 5-hmC levels can be asymmetrically distributed in a CpG site between strands (Yu, M., et al. 2012)                          |
| Repeats (SINEs, LTRs)                                                                                   | Binary                | Presence/absence of SINE or LTR annotation at the CpG site                                                                                                                                                                                                                                                               | Higher methylation suppresses transcription in repeat regions (Hackett, J.A., et al. 2013)                                  |
| Alu                                                                                                     | Binary                | Presence/absence of Alu annotation at the CpG site                                                                                                                                                                                                                                                                       | As above                                                                                                                    |
| <b>Epigenome-derived features</b>                                                                       |                       |                                                                                                                                                                                                                                                                                                                          |                                                                                                                             |
| Enhancers                                                                                               | Binary                | Created using a cutoff value of the ChIP-seq H3K27ac and H3K4me3 signal generated using MACS tool <sup>1</sup>                                                                                                                                                                                                           | 5-hmC is known to be overrepresented in enhancers (Stadler, M.B., et al. 2011)                                              |
| Core histone modification ChIP-seq signal                                                               | Continuous            | $-\log_{10}$ transformed ChIP-seq p-values based on ChIP binding and input control, as calculated by the MACS tool <sup>1</sup> . (H3K9me3, H3K4me3, H3K4me1, H3K36me3, H3K27me3, H3K27ac: available for 109 epigenomes) <sup>2</sup>                                                                                    | Repressive marks like H3K9me3 and H3K27me3 are often mutually exclusive with DNA methylation                                |
| Auxiliary histone modification ChIP-seq signal                                                          | Continuous            | Similarly processed data for additional histone modifications available for a limited number of epigenomes (H2AK5ac, H2AZ, H2BK120ac, H2BK12ac, H2BK15ac, H2BK20ac, H2BK5ac, H3K14ac, H3K18ac, H3K23ac, H3K23me2, H3K4ac, H3K4me1, H3K4me2, H3K56ac, H3K79me1, H3K79me2, H4K20me1, H4K5ac, H4K8ac, H4K91ac) <sup>2</sup> | As above                                                                                                                    |
| Histone states                                                                                          | Discrete: 1-15        | Using core histone modification signal for core marks to segment data into posterior decoded 15-state HMM annotation tool ChromHMM <sup>3</sup> , based on (Chadwick, 2012)                                                                                                                                              | Histone states have been shown to be well correlated with DNA methylation (Kundaje, A., et al. 2015)                        |
| BS-seq CCR                                                                                              | Continuous<br>∈ [0,1] | Percentage of cytosines remaining unchanged based on the Roadmap Epigenome consortium datasets <sup>2</sup>                                                                                                                                                                                                              | Used only for predicting 5-hmC status, since 5-hmC modifications show up as part of the BS-seq CCRs                         |
| <b>ChIP-seq TF binding-derived features</b>                                                             |                       |                                                                                                                                                                                                                                                                                                                          |                                                                                                                             |
| DNase-seq signal                                                                                        | Continuous            | Regions of open chromatin characterized by DNase digestion and sequencing: coverage signal contrasted with uniformly distributed read set simulation, and $-\log_{10}$ transform of p-value used <sup>2</sup>                                                                                                            | DNase hypersensitive regions positively correlated to active regulatory regions, negatively correlated to 5-mC              |
| CTCF ChIP-seq signal                                                                                    | Continuous            | $-\log_{10}$ transformed ChIP-seq p-values based on ChIP binding and input control for CTCF binding <sup>2</sup>                                                                                                                                                                                                         | Well-known insulator. Used only for H1 methylation and 5-hmC status prediction.                                             |
| p300 ChIP-seq signal                                                                                    | Continuous            | $-\log_{10}$ transformed ChIP-seq p-values based on ChIP binding and input control for p300 binding <sup>2</sup>                                                                                                                                                                                                         | p300 marks active transcription sites. Used only for H1 methylation and 5-hmC status prediction                             |

**Supplementary Table T3:** List of features used for predicting DNA methylation and hydroxymethylation. All features for methylation prediction were used for 5-hmC prediction as well, since 5-hmC is on the demethylation pathway. <sup>1</sup>(Zhang, Y., et al. 2008), <sup>2</sup>(Chadwick, L.H. 2012), <sup>3</sup>(Ernst, J. and Kellis, M. 2012)

**Machine learning framework for DNA hydroxymethylation prediction**

| Optimal Feature Selection in NPC CGI using SVM for different values of beam width parameter |                |                |                |
|---------------------------------------------------------------------------------------------|----------------|----------------|----------------|
| Beam Width                                                                                  |                |                |                |
| 2                                                                                           | 3              | 4              | 5              |
| DNase                                                                                       | DNase          | DNase          | DNase          |
| H2AK5ac                                                                                     | H2AK5ac        | H2AK5ac        | H2AK5ac        |
| H3K4me3                                                                                     | H3K4me3        | H3K4me3        | H3K4me3        |
| H3K9me3                                                                                     | H3K9me3        | H3K9me3        | H3K9me3        |
| Histone_states                                                                              | Histone_states | Histone_states | Histone_states |
| Bp_to_CGI                                                                                   |                | Bp_to_CGI      |                |

**Supplementary Table T4:** Similarity of OFS across different beam widths for beam search using SVM model for methylation status prediction in NPC CGI dataset.



Evaluation on genomic loci subsets by sampling balanced sets

Comparison of different predictive models in NPC dataset

| Data type | Sampling loci constraints | Predictive Model            | Input Features Used                                      | Datasets          |                   | Evaluation metrics |        |        |
|-----------|---------------------------|-----------------------------|----------------------------------------------------------|-------------------|-------------------|--------------------|--------|--------|
|           |                           |                             |                                                          | Trained on        | Tested on         | Precision          | Recall | Fscore |
| BS-seq    | CGI cytosines             | SVM                         | (SVM OFS)                                                | NPC (depth >= 20) | NPC (depth >= 20) | 0.96               | 0.95   | 0.95   |
| BS-seq    | CGI cytosines             | RF                          | (RF OFS)                                                 | NPC (depth >= 20) | NPC (depth >= 20) | 0.95               | 0.96   | 0.95   |
| BS-seq    | CGI cytosines             | Classification Tree         | (SVM OFS)                                                | NPC (depth >= 20) | NPC (depth >= 20) | 0.94               | 0.95   | 0.94   |
| BS-seq    | CGI cytosines             | Ensemble model with SVM and | SVM + N + C = (SVM features: SVM OFS + nearest neighbor) | NPC (depth >= 20) | NPC (depth >= 20) | 0.97               | 0.96   | 0.96   |
| BS-seq    | non-CGI cytosines         | SVM                         | (SVM OFS)                                                | NPC (depth >= 20) | NPC (depth >= 20) | 0.91               | 0.72   | 0.80   |
| BS-seq    | non-CGI cytosines         | RF                          | (RF OFS)                                                 | NPC (depth >= 20) | NPC (depth >= 20) | 0.89               | 0.74   | 0.81   |
| BS-seq    | non-CGI cytosines         | Classification Tree         | (SVM OFS)                                                | NPC (depth >= 20) | NPC (depth >= 20) | 0.71               | 0.71   | 0.71   |
| BS-seq    | non-CGI cytosines         | with SVM and consensus      | SVM OFS + nearest neighbor feature) + Consensus          | NPC (depth >= 20) | NPC (depth >= 20) | 0.93               | 0.78   | 0.85   |

Comparison of predictive abilities for different feature sets in NPC dataset

| Data type | Sampling loci constraints | Predictive Model                                           | Input Features Used                                                                              | Datasets          |                   | Evaluation metrics |        |        |
|-----------|---------------------------|------------------------------------------------------------|--------------------------------------------------------------------------------------------------|-------------------|-------------------|--------------------|--------|--------|
|           |                           |                                                            |                                                                                                  | Trained on        | Tested on         | Precision          | Recall | Fscore |
| BS-seq    | CGI cytosines             | SVM                                                        | (SVM OFS)                                                                                        | NPC (depth >= 20) | NPC (depth >= 20) | 0.96               | 0.95   | 0.95   |
| BS-seq    | CGI cytosines             | SVM                                                        | GF                                                                                               | NPC (depth >= 20) | NPC (depth >= 20) | 0.75               | 0.61   | 0.67   |
| BS-seq    | CGI cytosines             | SVM                                                        | CH                                                                                               | NPC (depth >= 20) | NPC (depth >= 20) | 0.95               | 0.85   | 0.90   |
| BS-seq    | CGI cytosines             | SVM                                                        | HP                                                                                               | NPC (depth >= 20) | NPC (depth >= 20) | 0.97               | 0.88   | 0.92   |
| BS-seq    | CGI cytosines             | SVM                                                        | HR                                                                                               | NPC (depth >= 20) | NPC (depth >= 20) | 0.78               | 0.97   | 0.86   |
| BS-seq    | CGI cytosines             | SVM                                                        | SVM + N = (SVM features: SVM OFS + nearest neighbor feature)                                     | NPC (depth >= 20) | NPC (depth >= 20) | 0.97               | 0.95   | 0.96   |
| BS-seq    | CGI cytosines             | with SVM and consensus reference methylome based           | SVM + N + C = (SVM features: SVM OFS + nearest neighbor feature) + Consensus Reference Methylome | NPC (depth >= 20) | NPC (depth >= 20) | 0.97               | 0.96   | 0.96   |
| BS-seq    | non-CGI cytosines         | SVM                                                        | (SVM OFS)                                                                                        | NPC (depth >= 20) | NPC (depth >= 20) | 0.91               | 0.72   | 0.80   |
| BS-seq    | non-CGI cytosines         | SVM                                                        | GF                                                                                               | NPC (depth >= 20) | NPC (depth >= 20) | 0.70               | 0.67   | 0.68   |
| BS-seq    | non-CGI cytosines         | SVM                                                        | CH                                                                                               | NPC (depth >= 20) | NPC (depth >= 20) | 0.88               | 0.65   | 0.75   |
| BS-seq    | non-CGI cytosines         | SVM                                                        | HP                                                                                               | NPC (depth >= 20) | NPC (depth >= 20) | 0.94               | 0.60   | 0.73   |
| BS-seq    | non-CGI cytosines         | SVM                                                        | HR                                                                                               | NPC (depth >= 20) | NPC (depth >= 20) | 0.87               | 0.72   | 0.79   |
| BS-seq    | non-CGI cytosines         | SVM                                                        | SVM + N = (SVM features: SVM OFS + nearest neighbor feature)                                     | NPC (depth >= 20) | NPC (depth >= 20) | 0.93               | 0.77   | 0.84   |
| BS-seq    | non-CGI cytosines         | with SVM and consensus reference methylome based predictor | SVM + N + C = (SVM features: SVM OFS + nearest neighbor feature) + Consensus Reference Methylome | NPC (depth >= 20) | NPC (depth >= 20) | 0.93               | 0.78   | 0.85   |

Comparison of predictive abilities for different feature sets in H1 dataset

| Data type | Sampling loci constraints | Predictive Model | Input Features Used | Datasets        |                 | Evaluation metrics |        |        |
|-----------|---------------------------|------------------|---------------------|-----------------|-----------------|--------------------|--------|--------|
|           |                           |                  |                     | Trained on      | Tested on       | Precision          | Recall | Fscore |
| BS-seq    | CGI cytosines             | SVM              | OFS                 | H1 (depth >=20) | H1 (depth >=20) | 0.96               | 0.96   | 0.96   |
| BS-seq    | CGI cytosines             | SVM              | GF                  | H1 (depth >=20) | H1 (depth >=20) | 0.72               | 0.65   | 0.68   |
| BS-seq    | CGI cytosines             | SVM              | CH                  | H1 (depth >=20) | H1 (depth >=20) | 0.95               | 0.91   | 0.93   |
| BS-seq    | CGI cytosines             | SVM              | HP                  | H1 (depth >=20) | H1 (depth >=20) | 0.96               | 0.96   | 0.96   |
| BS-seq    | CGI cytosines             | SVM              | HR                  | H1 (depth >=20) | H1 (depth >=20) | 0.76               | 0.99   | 0.86   |
| BS-seq    | non-CGI cytosines         | SVM              | OFS                 | H1 (depth >=20) | H1 (depth >=20) | 0.96               | 0.69   | 0.80   |
| BS-seq    | non-CGI cytosines         | SVM              | GF                  | H1 (depth >=20) | H1 (depth >=20) | 0.56               | 0.62   | 0.59   |
| BS-seq    | non-CGI cytosines         | SVM              | CH                  | H1 (depth >=20) | H1 (depth >=20) | 0.93               | 0.65   | 0.77   |
| BS-seq    | non-CGI cytosines         | SVM              | HP                  | H1 (depth >=20) | H1 (depth >=20) | 0.98               | 0.62   | 0.76   |
| BS-seq    | non-CGI cytosines         | SVM              | HR                  | H1 (depth >=20) | H1 (depth >=20) | 0.61               | 0.70   | 0.65   |

Comparisons of predictions involving the Consensus Reference Methylome

| Data type | Sampling loci constraints                   | Predictive Model                                           | Input Features Used                                                                              | Datasets          |                   | Evaluation metrics |        |        |
|-----------|---------------------------------------------|------------------------------------------------------------|--------------------------------------------------------------------------------------------------|-------------------|-------------------|--------------------|--------|--------|
|           |                                             |                                                            |                                                                                                  | Trained on        | Tested on         | Precision          | Recall | Fscore |
| BS-seq    | Cytosines with disagreement threshold = 0   | SVM                                                        | (SVM OFS)                                                                                        | NPC (depth >= 20) | NPC (depth >= 5)  | 0.87               | 0.99   | 0.93   |
| BS-seq    | Cytosines with disagreement threshold = 0   | Single predictor variable                                  | Consensus Reference Methylome                                                                    | NPC (depth >= 5)  | NPC (depth >= 5)  | 0.98               | 0.99   | 0.98   |
| BS-seq    | Cytosines with disagreement threshold <= 4  | Single predictor variable                                  | Consensus Reference Methylome                                                                    | NPC (depth >= 5)  | NPC (depth >= 5)  | 0.93               | 0.99   | 0.96   |
| BS-seq    | Cytosines with disagreement threshold <= 8  | Single predictor variable                                  | Consensus Reference Methylome                                                                    | NPC (depth >= 5)  | NPC (depth >= 5)  | 0.88               | 0.98   | 0.93   |
| BS-seq    | Cytosines with disagreement threshold <= 12 | Single predictor variable                                  | Consensus Reference Methylome                                                                    | NPC (depth >= 5)  | NPC (depth >= 5)  | 0.85               | 0.97   | 0.91   |
| BS-seq    | CGI cytosines                               | with SVM and consensus reference methylome based predictor | SVM + N + C = (SVM features: SVM OFS + nearest neighbor feature) + Consensus Reference Methylome | NPC (depth >= 20) | NPC (depth >= 20) | 0.97               | 0.96   | 0.96   |
| BS-seq    | non-CGI cytosines                           | with SVM and consensus reference methylome based predictor | SVM + N + C = (SVM features: SVM OFS + nearest neighbor feature) + Consensus Reference Methylome | NPC (depth >= 20) | NPC (depth >= 20) | 0.93               | 0.78   | 0.85   |

Comparisons of predictions involving the Nearest Neighbor Methylation Status predictor

| Data type | Sampling loci constraints                                          | Predictive Model          | Input Features Used     | Datasets         |                  | Evaluation metrics |        |        |
|-----------|--------------------------------------------------------------------|---------------------------|-------------------------|------------------|------------------|--------------------|--------|--------|
|           |                                                                    |                           |                         | Trained on       | Tested on        | Precision          | Recall | Fscore |
| BS-seq    | All cytosines with nearest neighbor distance within 2 - 20 bp      | Single predictor variable | Nearest neighbor status | NPC (depth >= 5) | NPC (depth >= 5) | 0.96               | 0.98   | 0.97   |
| BS-seq    | All cytosines with nearest neighbor within distance 20 - 50 bp     | Single predictor variable | Nearest neighbor status | NPC (depth >= 5) | NPC (depth >= 5) | 0.96               | 0.98   | 0.97   |
| BS-seq    | All cytosines with nearest neighbor within distance 50 - 100 bp    | Single predictor variable | Nearest neighbor status | NPC (depth >= 5) | NPC (depth >= 5) | 0.95               | 0.97   | 0.96   |
| BS-seq    | All cytosines with nearest neighbor within distance 100 - 200 bp   | Single predictor variable | Nearest neighbor status | NPC (depth >= 5) | NPC (depth >= 5) | 0.95               | 0.97   | 0.96   |
| BS-seq    | All cytosines with nearest neighbor within distance 200 - 500 bp   | Single predictor variable | Nearest neighbor status | NPC (depth >= 5) | NPC (depth >= 5) | 0.91               | 0.95   | 0.93   |
| BS-seq    | All cytosines with nearest neighbor within distance 500 - 1000 bp  | Single predictor variable | Nearest neighbor status | NPC (depth >= 5) | NPC (depth >= 5) | 0.81               | 0.92   | 0.86   |
| BS-seq    | All cytosines with nearest neighbor within distance 1000 - 1500 bp | Single predictor variable | Nearest neighbor status | NPC (depth >= 5) | NPC (depth >= 5) | 0.70               | 0.89   | 0.78   |
| BS-seq    | All cytosines with nearest neighbor within distance 1500 - 2000 bp | Single predictor variable | Nearest neighbor status | NPC (depth >= 5) | NPC (depth >= 5) | 0.62               | 0.89   | 0.73   |
| BS-seq    | All cytosines with nearest neighbor within distance 2000 - 2500 bp | Single predictor variable | Nearest neighbor status | NPC (depth >= 5) | NPC (depth >= 5) | 0.59               | 0.88   | 0.71   |

Prediction metrics with intermediate methylation removed

| Data type | Sampling loci constraints | Predictive Model | Input Features Used | Datasets                                             |                                                      | Evaluation metrics |        |        |
|-----------|---------------------------|------------------|---------------------|------------------------------------------------------|------------------------------------------------------|--------------------|--------|--------|
|           |                           |                  |                     | Trained on                                           | Tested on                                            | Precision          | Recall | Fscore |
| BS-seq    | CGI cytosines             | SVM              | (SVM OFS)           | H1 (depth >= 20, no intermediate methylation sites)  | H1 (depth >= 20, no intermediate methylation sites)  | 0.97               | 0.97   | 0.97   |
| BS-seq    | non-CGI cytosines         | SVM              | (SVM OFS)           | H1 (depth >= 20, no intermediate methylation sites)  | H1 (depth >= 20, no intermediate methylation sites)  | 0.96               | 0.72   | 0.82   |
| BS-seq    | CGI cytosines             | SVM              | (SVM OFS)           | NPC (depth >= 20, no intermediate methylation sites) | NPC (depth >= 20, no intermediate methylation sites) | 0.97               | 0.97   | 0.97   |
| BS-seq    | non-CGI cytosines         | SVM              | (SVM OFS)           | NPC (depth >= 20, no intermediate methylation sites) | NPC (depth >= 20, no intermediate methylation sites) | 0.94               | 0.77   | 0.85   |

Supplementary Table T5: Balanced set evaluations for DNA methylation status predictions

## Machine learning framework for DNA hydroxymethylation prediction

Evaluation on genomic loci subsets

### Comparison of SVM predictive model in NPC and H1 datasets

| Data type | Evaluation loci constraints | Predictive Model | Input Features Used | Datasets          |                   | Evaluation metrics |         |         |         |      |      |          |
|-----------|-----------------------------|------------------|---------------------|-------------------|-------------------|--------------------|---------|---------|---------|------|------|----------|
|           |                             |                  |                     | Trained on        | Tested on         | TP                 | TN      | FP      | FN      | TPR  | TNR  | Accuracy |
| BS-seq    | All cytosines               | SVM              | (SVM OFS)           | NPC (depth >= 20) | NPC (depth >= 20) | 43477143           | 3808315 | 1628764 | 220277  | 0.99 | 0.70 | 0.96     |
| BS-seq    | All cytosines               | SVM              | (SVM OFS)           | H1 (depth >= 20)  | H1 (depth >= 20)  | 43625145           | 3253354 | 1440859 | 2060474 | 0.95 | 0.69 | 0.93     |

### Transfer learning between datasets using SVM predictive model

| Data type | Evaluation loci constraints | Predictive Model | Input Features Used | Datasets          |                                         | Evaluation metrics |         |         |         |      |      |          |
|-----------|-----------------------------|------------------|---------------------|-------------------|-----------------------------------------|--------------------|---------|---------|---------|------|------|----------|
|           |                             |                  |                     | Trained on        | Tested on                               | TP                 | TN      | FP      | FN      | TPR  | TNR  | Accuracy |
| BS-seq    | All cytosines               | SVM              | (SVM NPC OFS)       | NPC (depth >= 20) | H1 (depth >= 20)                        | 41317737           | 3727930 | 966283  | 4367882 | 0.90 | 0.79 | 0.89     |
| BS-seq    | All cytosines               | SVM              | (SVM H1 OFS)        | H1 (depth >= 20)  | NPC (depth >= 20)                       | 42286042           | 2999939 | 2437140 | 1411378 | 0.97 | 0.55 | 0.92     |
| BS-seq    | All cytosines               | SVM              | (SVM NPC OFS)       | NPC (depth >= 20) | MSC (depth >= 20)                       | 23703248           | 2779019 | 1132119 | 3528772 | 0.87 | 0.71 | 0.85     |
| BS-seq    | All cytosines               | SVM              | (SVM NPC OFS)       | NPC (depth >= 20) | IMR90 (depth >= 20, no sex chromosomes) | 24457244           | 2292688 | 7853852 | 3990412 | 0.86 | 0.23 | 0.69     |

### Comparison of different predictive models in NPC dataset

| Data type | Evaluation loci constraints | Predictive Model | Input Features Used   | Datasets          |                   | Evaluation metrics |         |         |        |      |      |          |
|-----------|-----------------------------|------------------|-----------------------|-------------------|-------------------|--------------------|---------|---------|--------|------|------|----------|
|           |                             |                  |                       | Trained on        | Tested on         | TP                 | TN      | FP      | FN     | TPR  | TNR  | Accuracy |
| BS-seq    | All cytosines               | SVM              | (SVM OFS)             | NPC (depth >= 20) | NPC (depth >= 20) | 43477143           | 3808315 | 1628764 | 220277 | 0.99 | 0.70 | 0.96     |
| BS-seq    | All cytosines               | with SVM and     | (SVM OFS) + Consensus | NPC (depth >= 20) | NPC (depth >= 20) | 43516018           | 4072279 | 1364800 | 181402 | 0.99 | 0.75 | 0.97     |
| BS-seq    | All cytosines               | RF               | (RF OFS)              | NPC (depth >= 20) | NPC (depth >= 20) | 43409038           | 3928194 | 1508885 | 28382  | 0.99 | 0.72 | 0.96     |

### Comparisons of predictions involving the Consensus Reference Methylation

| Data type | Evaluation loci constraints               | Predictive Model          | Input Features Used             | Datasets          |                  | Evaluation metrics |         |        |       |      |      |          |
|-----------|-------------------------------------------|---------------------------|---------------------------------|-------------------|------------------|--------------------|---------|--------|-------|------|------|----------|
|           |                                           |                           |                                 | Trained on        | Tested on        | TP                 | TN      | FP     | FN    | TPR  | TNR  | Accuracy |
| BS-seq    | Cytosines with disagreement threshold = 0 | SVM                       | (SVM OFS)                       | NPC (depth >= 20) | NPC (depth >= 5) | 22892862           | 1724692 | 298403 | 48224 | 0.99 | 0.85 | 0.99     |
| BS-seq    | Cytosines with disagreement threshold = 0 | Single predictor variable | Consensus Reference Methylation | NPC (depth >= 5)  | NPC (depth >= 5) | 22931737           | 1988656 | 34439  | 9349  | 0.99 | 0.98 | 0.99     |

### Comparisons of predictions involving the Nearest Neighbor Methylation Status predictor

| Data type | Evaluation loci constraints                                        | Predictive Model          | Input Features Used     | Datasets         |                  | Evaluation metrics |           |          |          |      |      |          |
|-----------|--------------------------------------------------------------------|---------------------------|-------------------------|------------------|------------------|--------------------|-----------|----------|----------|------|------|----------|
|           |                                                                    |                           |                         | Trained on       | Tested on        | TP                 | TN        | FP       | FN       | TPR  | TNR  | Accuracy |
| BS-seq    | All cytosines with nearest neighbor distance within 2 - 20 bp      | Single predictor variable | Nearest neighbor status | NPC (depth >= 5) | NPC (depth >= 5) | 29550709           | 14763379  | 564837   | 564881   | 0.98 | 0.96 | 0.98     |
| BS-seq    | All cytosines with nearest neighbor within distance 20 - 50 bp     | Single predictor variable | Nearest neighbor status | NPC (depth >= 5) | NPC (depth >= 5) | 49875774           | 24255756  | 1059991  | 1063485  | 0.98 | 0.96 | 0.97     |
| BS-seq    | All cytosines with nearest neighbor within distance 50 - 100 bp    | Single predictor variable | Nearest neighbor status | NPC (depth >= 5) | NPC (depth >= 5) | 74673162           | 38853553  | 1929159  | 1939160  | 0.97 | 0.95 | 0.97     |
| BS-seq    | All cytosines with nearest neighbor within distance 100 - 200 bp   | Single predictor variable | Nearest neighbor status | NPC (depth >= 5) | NPC (depth >= 5) | 134860662          | 72343025  | 4301602  | 4328057  | 0.97 | 0.94 | 0.96     |
| BS-seq    | All cytosines with nearest neighbor within distance 200 - 500 bp   | Single predictor variable | Nearest neighbor status | NPC (depth >= 5) | NPC (depth >= 5) | 343604957          | 178749445 | 18992938 | 19013419 | 0.95 | 0.90 | 0.93     |
| BS-seq    | All cytosines with nearest neighbor within distance 500 - 1000 bp  | Single predictor variable | Nearest neighbor status | NPC (depth >= 5) | NPC (depth >= 5) | 535404825          | 184117716 | 49462992 | 49353293 | 0.92 | 0.79 | 0.88     |
| BS-seq    | All cytosines with nearest neighbor within distance 1000 - 1500 bp | Single predictor variable | Nearest neighbor status | NPC (depth >= 5) | NPC (depth >= 5) | 516462743          | 97126961  | 61567274 | 61614285 | 0.89 | 0.61 | 0.83     |
| BS-seq    | All cytosines with nearest neighbor within distance 1500 - 2000 bp | Single predictor variable | Nearest neighbor status | NPC (depth >= 5) | NPC (depth >= 5) | 506944740          | 57313501  | 65247592 | 64967145 | 0.89 | 0.47 | 0.81     |
| BS-seq    | All cytosines with nearest neighbor within distance 2000 - 2500 bp | Single predictor variable | Nearest neighbor status | NPC (depth >= 5) | NPC (depth >= 5) | 502844979          | 40255457  | 65773735 | 65603667 | 0.88 | 0.38 | 0.81     |

### Comparisons of predictions involving the Nearest Neighbor Methylation Status predictor

| Data type | Evaluation loci constraints | Predictive Model                         | Input Features Used                  | Datasets         |                  | Evaluation metrics |         |         |         |      |      |          |
|-----------|-----------------------------|------------------------------------------|--------------------------------------|------------------|------------------|--------------------|---------|---------|---------|------|------|----------|
|           |                             |                                          |                                      | Trained on       | Tested on        | TP                 | TN      | FP      | FN      | TPR  | TNR  | Accuracy |
| BS-seq    | All cytosines               | Nearest neighbor status (N1)             | Nearest neighbor status              | NPC (depth >= 5) | NPC (depth >= 5) | 92474170           | 9903311 | 2108509 | 2075216 | 0.98 | 0.82 | 0.96     |
| BS-seq    | All cytosines               | 2nd Nearest neighbor status (N2)         | 2nd Nearest neighbor status          | NPC (depth >= 5) | NPC (depth >= 5) | 92279738           | 9765000 | 2246820 | 2269648 | 0.98 | 0.81 | 0.96     |
| BS-seq    | All cytosines               | 3rd Nearest neighbor status (N3)         | 3rd Nearest neighbor status          | NPC (depth >= 5) | NPC (depth >= 5) | 92127642           | 9647770 | 2364050 | 2421744 | 0.97 | 0.80 | 0.96     |
| BS-seq    | All cytosines               | Vote among 3 Nearest neighbor status (V) | Vote among 3 Nearest neighbor status | NPC (depth >= 5) | NPC (depth >= 5) | 46819091           | 4897408 | 1108502 | 455602  | 0.99 | 0.82 | 0.97     |

### Comparisons of predictions in H1 and NPC for different ranges of BS-seq CCRs

| Data type | Evaluation loci constraints | Predictive Model | Input Features Used | Datasets                                            |                                                     | Accuracy |
|-----------|-----------------------------|------------------|---------------------|-----------------------------------------------------|-----------------------------------------------------|----------|
|           |                             |                  |                     | Trained on                                          | Tested on                                           |          |
| BS-seq    | All cytosines               | RF               | (RF OFS)            | NPC (depth >= 20, methylation CCR range [0.0, 0.2]) | NPC (depth >= 20, methylation CCR range [0.0, 0.2]) | 0.81     |
| BS-seq    | All cytosines               | RF               | (RF OFS)            | NPC (depth >= 20, methylation CCR range [0.2, 0.4]) | NPC (depth >= 20, methylation CCR range [0.2, 0.4]) | 0.61     |
| BS-seq    | All cytosines               | RF               | (RF OFS)            | NPC (depth >= 20, methylation CCR range [0.4, 0.6]) | NPC (depth >= 20, methylation CCR range [0.4, 0.6]) | 0.54     |
| BS-seq    | All cytosines               | RF               | (RF OFS)            | NPC (depth >= 20, methylation CCR range [0.6, 0.8]) | NPC (depth >= 20, methylation CCR range [0.6, 0.8]) | 0.92     |
| BS-seq    | All cytosines               | RF               | (RF OFS)            | NPC (depth >= 20, methylation CCR range [0.8, 1.0]) | NPC (depth >= 20, methylation CCR range [0.8, 1.0]) | 0.99     |
| BS-seq    | All cytosines               | SVM              | (SVM OFS)           | H1 (depth >= 20, methylation CCR range [0.0, 0.2])  | H1 (depth >= 20, methylation CCR range [0.0, 0.2])  | 0.72     |
| BS-seq    | All cytosines               | SVM              | (SVM OFS)           | H1 (depth >= 20, methylation CCR range [0.2, 0.4])  | H1 (depth >= 20, methylation CCR range [0.2, 0.4])  | 0.69     |
| BS-seq    | All cytosines               | SVM              | (SVM OFS)           | H1 (depth >= 20, methylation CCR range [0.4, 0.6])  | H1 (depth >= 20, methylation CCR range [0.4, 0.6])  | 0.57     |
| BS-seq    | All cytosines               | SVM              | (SVM OFS)           | H1 (depth >= 20, methylation CCR range [0.6, 0.8])  | H1 (depth >= 20, methylation CCR range [0.6, 0.8])  | 0.96     |
| BS-seq    | All cytosines               | SVM              | (SVM OFS)           | H1 (depth >= 20, methylation CCR range [0.8, 1.0])  | H1 (depth >= 20, methylation CCR range [0.8, 1.0])  | 0.97     |

Supplementary Table T6: Whole genome evaluations for DNA methylation status predictions

| <b>(A): Biologically meaningful feature sets H1 BS-seq using SVM</b> |     |    |    |    |    |         |    |    |    |    |                |
|----------------------------------------------------------------------|-----|----|----|----|----|---------|----|----|----|----|----------------|
|                                                                      | CGI |    |    |    |    | Non-CGI |    |    |    |    |                |
|                                                                      | OFS | HR | HP | CH | GF | OFS     | HR | HP | CH | GF |                |
| Alu_repeat                                                           |     |    |    |    | ✓  |         |    |    |    | ✓  | Alu_repeat     |
| Bp_to_CGI                                                            |     | ✓  |    |    | ✓  |         |    | ✓  |    | ✓  | Bp_to_CGI      |
| CG_sat_50bp                                                          | ✓   |    | ✓  |    | ✓  | ✓       | ✓  |    |    | ✓  | CG_sat_50bp    |
| CpG_sat_50bp                                                         |     |    |    |    | ✓  |         |    |    |    | ✓  | CpG_sat_50bp   |
| CpG_to_CGI                                                           |     | ✓  |    |    | ✓  | ✓       | ✓  |    |    | ✓  | CpG_to_CGI     |
| DNase                                                                | ✓   | ✓  | ✓  |    |    | ✓       | ✓  |    |    |    | DNase          |
| G_sat_50bp                                                           |     |    |    |    | ✓  |         |    |    |    | ✓  | G_sat_50bp     |
| H2AK5ac                                                              |     |    |    |    |    |         |    |    |    |    | H2AK5ac        |
| H3K27ac                                                              |     |    |    | ✓  |    | ✓       | ✓  | ✓  | ✓  |    | H3K27ac        |
| H3K27me3                                                             | ✓   | ✓  | ✓  | ✓  |    | ✓       | ✓  |    | ✓  |    | H3K27me3       |
| H3K36me3                                                             | ✓   |    | ✓  | ✓  |    |         |    |    | ✓  |    | H3K36me3       |
| H3K4me1                                                              |     |    |    | ✓  |    | ✓       |    |    | ✓  |    | H3K4me1        |
| H3K4me3                                                              | ✓   | ✓  | ✓  | ✓  |    | ✓       | ✓  | ✓  | ✓  |    | H3K4me3        |
| H3K79me1                                                             |     |    |    |    |    |         |    |    |    |    | H3K79me1       |
| H3K9ac                                                               |     |    |    |    |    | ✓       |    | ✓  |    |    | H3K9ac         |
| H3K9me3                                                              | ✓   |    | ✓  |    |    |         | ✓  |    |    |    | H3K9me3        |
| Histone_states                                                       | ✓   | ✓  | ✓  |    |    |         | ✓  |    |    |    | Histone_states |
| Repeats                                                              |     |    |    |    | ✓  |         |    |    |    | ✓  | Repeats        |
| CTCF                                                                 |     |    |    |    |    | ✓       | ✓  |    |    |    | CTCF           |

| <b>(B): Random Forest Optimal Feature Sets in NPC</b> |     |         |
|-------------------------------------------------------|-----|---------|
| Feature List                                          | CGI | Non-CGI |
| CG_sat_50bp                                           |     |         |
| CpG_sat_50bp                                          | ✓   |         |
| CpG_to_CGI                                            |     | ✓       |
| G_sat_50bp                                            |     | ✓       |
| Alu_repeat                                            |     |         |
| Bp_to_CGI                                             | ✓   | ✓       |
| DNase                                                 | ✓   | ✓       |
| Repeats                                               |     | ✓       |
| H2AK5ac                                               | ✓   | ✓       |
| H3K27ac                                               |     |         |
| H3K27me3                                              | ✓   | ✓       |
| H3K36me3                                              | ✓   | ✓       |
| H3K4me1                                               |     | ✓       |
| H3K4me3                                               | ✓   | ✓       |
| H3K79me1                                              | ✓   |         |
| H3K9ac                                                |     |         |
| H3K9me3                                               | ✓   | ✓       |
| Histone_states                                        | ✓   | ✓       |

**Supplementary Table T7:** (A) Feature sets for methylation status prediction using SVM in H1 CGI and non-CGI datasets. (B) OFS for methylation status prediction using RF in NPC CGI and non-CGI datasets

**Machine learning framework for DNA hydroxymethylation prediction**

| <b>(A): Various beam search feature sets used to show metric improvement in H1 BS-seq non-CGI using SVM</b> |              |   |   |   |   |   |   |
|-------------------------------------------------------------------------------------------------------------|--------------|---|---|---|---|---|---|
|                                                                                                             | Feature Sets |   |   |   |   |   |   |
|                                                                                                             | A            | B | C | D | E | F | G |
| Alu_repeat                                                                                                  | ✓            |   |   |   |   |   |   |
| Bp_to_CGI                                                                                                   | ✓            |   |   |   |   | ✓ |   |
| CG_sat_50bp                                                                                                 | ✓            |   |   | ✓ |   | ✓ |   |
| CpG_sat_50bp                                                                                                | ✓            |   |   |   |   |   |   |
| CpG_to_CGI                                                                                                  | ✓            |   | ✓ |   | ✓ |   | ✓ |
| DNase                                                                                                       | ✓            | ✓ | ✓ |   | ✓ | ✓ | ✓ |
| G_sat_50bp                                                                                                  | ✓            |   |   |   |   |   |   |
| H2AK5ac                                                                                                     | ✓            | ✓ | ✓ | ✓ | ✓ | ✓ | ✓ |
| H3K27ac                                                                                                     | ✓            | ✓ | ✓ | ✓ | ✓ | ✓ | ✓ |
| H3K27me3                                                                                                    | ✓            | ✓ |   | ✓ |   |   | ✓ |
| H3K36me3                                                                                                    | ✓            |   |   |   | ✓ | ✓ |   |
| H3K4me1                                                                                                     | ✓            |   |   | ✓ | ✓ | ✓ | ✓ |
| H3K4me3                                                                                                     | ✓            |   |   |   | ✓ | ✓ | ✓ |
| H3K79me1                                                                                                    | ✓            |   |   |   |   |   |   |
| H3K9ac                                                                                                      | ✓            |   |   |   |   |   |   |
| H3K9me3                                                                                                     | ✓            |   |   |   |   |   |   |
| Histone_states                                                                                              | ✓            |   |   | ✓ |   | ✓ | ✓ |
| Repeats                                                                                                     | ✓            | ✓ | ✓ | ✓ | ✓ | ✓ | ✓ |

| <b>(B): Prediction metric for H1 Beam Search BS-seq in non-CGI using SVM</b> |           |        |
|------------------------------------------------------------------------------|-----------|--------|
|                                                                              | Precision | Recall |
| A                                                                            | 0.7970    | 0.7292 |
| B                                                                            | 0.8170    | 0.7262 |
| C                                                                            | 0.8180    | 0.7363 |
| D                                                                            | 0.8470    | 0.7340 |
| E                                                                            | 0.8570    | 0.7439 |
| F                                                                            | 0.8970    | 0.7334 |
| G                                                                            | 0.9200    | 0.7342 |

**Supplementary Table T8:** Underlying data for Figure 2E, showing F-score (for H1 non-CGI methylation status prediction) trajectory as beam search algorithm searches through feature space. (A) For incrementally improved F-scores, the feature sets are shown. (B) For each improved F-score, the corresponding precision and recall values are shown.

| <b>(A): Reference methylome sizes</b>                           | Disagreement threshold |             |             |             |
|-----------------------------------------------------------------|------------------------|-------------|-------------|-------------|
|                                                                 | 0                      | 4           | 8           | 12          |
| Size of the reference methylome relative to the whole methylome | 0.44236051             | 0.664482316 | 0.716133503 | 0.751079765 |

| <b>(B): Cell lines &amp; tissues used to create reference methylome</b> |                 |
|-------------------------------------------------------------------------|-----------------|
| H9 Cell Line                                                            | Gastric         |
| HUES64 Cell Line                                                        | Left Ventricle  |
| iPS DF 6.9 Cell Line                                                    | Lung            |
| iPS DF 19.11 Cell Line                                                  | Ovary           |
| 4star                                                                   | Pancreas        |
| IMR90 Cell Line                                                         | Psoas Muscle    |
| Mobilized CD34 Primary Cells Female                                     | Right Atrium    |
| Neurosphere Cultured Cells Cortex Derived                               | Right Ventricle |
| Penis Foreskin Keratinocyte Primary Cells skin03                        | Sigmoid Colon   |
| Aorta                                                                   | Small Intestine |
| Adult Liver                                                             | Thymus          |
| Brain Hippocampus Middle                                                | Spleen          |
| Esophagus                                                               |                 |

**Supplementary Table T9:** (A) Underlying data for Figure 3B, showing the size of the consensus reference methylome with disagreement thresholds 0, 4, 8, and 12 as a fraction of the entire methylome (in terms of CpG cytosines). (B) List of reference methylomes used to create the consensus reference methylome.

Evaluation on genomic loci subsets by sampling balanced sets

Comparison of predictive abilities for different feature sets in NPC dataset

| Data type | Sampling loci constraints | Predictive Model | Input Features Used | Datasets          |                   | Evaluation metrics |        |        |
|-----------|---------------------------|------------------|---------------------|-------------------|-------------------|--------------------|--------|--------|
|           |                           |                  |                     | Trained on        | Tested on         | Precision          | Recall | Fscore |
| TAB-seq   | All cytosines             | SVM              | (SVM OFS)           | NPC (depth >= 60) | NPC (depth >= 60) | 0.75               | 0.80   | 0.77   |
| TAB-seq   | All cytosines             | SVM              | GF                  | NPC (depth >= 60) | NPC (depth >= 60) | 0.73               | 0.63   | 0.68   |
| TAB-seq   | All cytosines             | SVM              | CH                  | NPC (depth >= 60) | NPC (depth >= 60) | 0.62               | 0.76   | 0.68   |
| TAB-seq   | All cytosines             | SVM              | HP                  | NPC (depth >= 60) | NPC (depth >= 60) | 0.80               | 0.73   | 0.76   |
| TAB-seq   | All cytosines             | SVM              | HR                  | NPC (depth >= 60) | NPC (depth >= 60) | 0.65               | 0.84   | 0.73   |

Comparison of predictive abilities for different feature sets in H1 dataset

| Data type | Sampling loci constraints | Predictive Model | Input Features Used | Datasets         |                  | Evaluation metrics |        |        |
|-----------|---------------------------|------------------|---------------------|------------------|------------------|--------------------|--------|--------|
|           |                           |                  |                     | Trained on       | Tested on        | Precision          | Recall | Fscore |
| TAB-seq   | All cytosines             | SVM              | (SVM OFS)           | H1 (depth >= 60) | H1 (depth >= 60) | 0.67               | 0.74   | 0.70   |
| TAB-seq   | All cytosines             | SVM              | GF                  | H1 (depth >= 60) | H1 (depth >= 60) | 0.62               | 0.64   | 0.63   |
| TAB-seq   | All cytosines             | SVM              | CH                  | H1 (depth >= 60) | H1 (depth >= 60) | 0.58               | 0.74   | 0.65   |
| TAB-seq   | All cytosines             | SVM              | HP                  | H1 (depth >= 60) | H1 (depth >= 60) | 0.67               | 0.65   | 0.66   |
| TAB-seq   | All cytosines             | SVM              | HR                  | H1 (depth >= 60) | H1 (depth >= 60) | 0.57               | 0.76   | 0.65   |

Comparison of predictive abilities for different feature sets in NPC enhancer dataset

| Data type | Sampling loci constraints | Predictive Model | Input Features Used | Datasets          |                   | Evaluation metrics |        |        |
|-----------|---------------------------|------------------|---------------------|-------------------|-------------------|--------------------|--------|--------|
|           |                           |                  |                     | Trained on        | Tested on         | Precision          | Recall | Fscore |
| TAB-seq   | Enhancer cytosines        | SVM              | (SVM OFS)           | NPC (depth >= 60) | NPC (depth >= 60) | 0.77               | 0.82   | 0.79   |
| TAB-seq   | Enhancer cytosines        | SVM              | GF                  | NPC (depth >= 60) | NPC (depth >= 60) | 0.73               | 0.63   | 0.68   |
| TAB-seq   | Enhancer cytosines        | SVM              | CH                  | NPC (depth >= 60) | NPC (depth >= 60) | 0.63               | 0.75   | 0.68   |
| TAB-seq   | Enhancer cytosines        | SVM              | HP                  | NPC (depth >= 60) | NPC (depth >= 60) | 0.93               | 0.53   | 0.68   |
| TAB-seq   | Enhancer cytosines        | SVM              | HR                  | NPC (depth >= 60) | NPC (depth >= 60) | 0.63               | 0.82   | 0.71   |

Comparison of different predictive models in NPC dataset

| Data type | Sampling loci constraints | Predictive Model | Input Features Used | Datasets          |                   | Evaluation metrics |        |        |
|-----------|---------------------------|------------------|---------------------|-------------------|-------------------|--------------------|--------|--------|
|           |                           |                  |                     | Trained on        | Tested on         | Precision          | Recall | Fscore |
| TAB-seq   | All cytosines             | SVM              | (SVM OFS)           | NPC (depth >= 60) | NPC (depth >= 60) | 0.75               | 0.80   | 0.77   |
| TAB-seq   | All cytosines             | RF               | (RF OFS)            | NPC (depth >= 60) | NPC (depth >= 60) | 0.78               | 0.82   | 0.80   |

Comparison of different predictive models in NPC dataset

| Data type | Sampling loci constraints         | Predictive Model | Input Features Used | Datasets          |                   | Evaluation metrics |        |        |
|-----------|-----------------------------------|------------------|---------------------|-------------------|-------------------|--------------------|--------|--------|
|           |                                   |                  |                     | Trained on        | Tested on         | Precision          | Recall | Fscore |
| TAB-seq   | Cytosines with high BS-seq levels | SVM              | (SVM OFS)           | NPC (depth >= 60) | NPC (depth >= 60) | 0.74               | 0.80   | 0.77   |
| TAB-seq   | All cytosines                     | SVM              | (SVM OFS)           | NPC (depth >= 60) | NPC (depth >= 60) | 0.75               | 0.80   | 0.77   |

Evaluation on genomic loci subsets

Comparison of SVM models in NPC and H1 datasets

| Data type | Evaluation loci constraints | Predictive Model | Input Features Used | Datasets          |                   | Evaluation metrics |         |         |        |      |      |          |
|-----------|-----------------------------|------------------|---------------------|-------------------|-------------------|--------------------|---------|---------|--------|------|------|----------|
|           |                             |                  |                     | Trained on        | Tested on         | TP                 | TN      | FP      | FN     | TPR  | TNR  | Accuracy |
| TAB-seq   | All cytosines               | SVM              | (SVM OFS)           | NPC (depth >= 60) | NPC (depth >= 60) | 339376             | 7269832 | 1578026 | 114373 | 0.75 | 0.82 | 0.82     |
| TAB-seq   | All cytosines               | SVM              | (SVM OFS)           | H1 (depth >= 60)  | H1 (depth >= 60)  | 84682              | 1664105 | 552163  | 40920  | 0.67 | 0.75 | 0.75     |

Comparison of SVM models in NPC enhancer regions, non-enhancer regions, & whole genome

| Data type | Evaluation loci constraints | Predictive Model | Input Features Used | Datasets          |                   | Evaluation metrics |         |         |        |      |      |          |
|-----------|-----------------------------|------------------|---------------------|-------------------|-------------------|--------------------|---------|---------|--------|------|------|----------|
|           |                             |                  |                     | Trained on        | Tested on         | TP                 | TN      | FP      | FN     | TPR  | TNR  | Accuracy |
| TAB-seq   | Enhancer cytosines          | SVM              | (SVM OFS)           | NPC (depth >= 60) | NPC (depth >= 60) | 67008              | 311652  | 123148  | 12030  | 0.85 | 0.72 | 0.74     |
| TAB-seq   | Non-enhancer cytosines      | SVM              | (SVM OFS)           | NPC (depth >= 60) | NPC (depth >= 60) | 272368             | 6958180 | 1454878 | 102343 | 0.73 | 0.83 | 0.82     |
| TAB-seq   | All cytosines               | SVM              | (SVM OFS)           | NPC (depth >= 60) | NPC (depth >= 60) | 339376             | 7269832 | 1578026 | 114373 | 0.75 | 0.82 | 0.82     |

Comparison of different predictive models in NPC dataset

| Data type | Evaluation loci constraints | Predictive Model | Input Features Used | Datasets          |                   | Evaluation metrics |         |         |        |      |      |          |
|-----------|-----------------------------|------------------|---------------------|-------------------|-------------------|--------------------|---------|---------|--------|------|------|----------|
|           |                             |                  |                     | Trained on        | Tested on         | TP                 | TN      | FP      | FN     | TPR  | TNR  | Accuracy |
| TAB-seq   | All cytosines               | SVM              | (SVM OFS)           | NPC (depth >= 60) | NPC (depth >= 60) | 339376             | 7269832 | 1578026 | 114373 | 0.75 | 0.82 | 0.82     |
| TAB-seq   | All cytosines               | RF               | (RF OFS)            | NPC (depth >= 60) | NPC (depth >= 60) | 348195             | 7260210 | 1587648 | 105554 | 0.77 | 0.82 | 0.82     |

Transfer learning between H1 and NPC datasets using SVM predictive model

| Data type | Evaluation loci constraints | Predictive Model | Input Features Used | Datasets          |                   | Evaluation metrics |         |         |        |      |      |          |
|-----------|-----------------------------|------------------|---------------------|-------------------|-------------------|--------------------|---------|---------|--------|------|------|----------|
|           |                             |                  |                     | Trained on        | Tested on         | TP                 | TN      | FP      | FN     | TPR  | TNR  | Accuracy |
| TAB-seq   | All cytosines               | SVM              | (SVM NPC OFS)       | NPC (depth >= 60) | H1 (depth >= 60)  | 80328              | 1510583 | 705685  | 45364  | 0.64 | 0.68 | 0.68     |
| TAB-seq   | All cytosines               | SVM              | (SVM H1 OFS)        | H1 (depth >= 60)  | NPC (depth >= 60) | 295697             | 6559183 | 2288675 | 158052 | 0.65 | 0.74 | 0.74     |

Supplementary Table T10: Balanced set and whole genome evaluations for 5-hmC status predictions

**Machine learning framework for DNA hydroxymethylation prediction**

| <b>(A) Biologically meaningful feature sets for 5-hmC status prediction on balanced sets using SVM</b> |               |    |    |    |    |     |    |    |    |    |     |    |    |    |    |
|--------------------------------------------------------------------------------------------------------|---------------|----|----|----|----|-----|----|----|----|----|-----|----|----|----|----|
|                                                                                                        | NPC enhancers |    |    |    |    | NPC |    |    |    |    | H1  |    |    |    |    |
|                                                                                                        | OFS           | HR | HP | CH | GF | OFS | HR | HP | CH | GF | OFS | HR | HP | CH | GF |
| Alu_repeat                                                                                             | ✓             | ✓  | ✓  |    | ✓  | ✓   |    |    |    | ✓  | ✓   |    |    |    | ✓  |
| BS-seq_CCR                                                                                             | ✓             | ✓  |    |    |    | ✓   | ✓  |    |    |    | ✓   | ✓  | ✓  |    |    |
| Bp_to_CGI                                                                                              |               |    |    |    | ✓  |     |    |    |    | ✓  |     |    |    |    | ✓  |
| CG_sat_50bp                                                                                            | ✓             |    |    |    | ✓  | ✓   | ✓  | ✓  |    | ✓  | ✓   |    | ✓  |    | ✓  |
| CpG_sat_50bp                                                                                           |               |    |    |    | ✓  |     |    | ✓  |    | ✓  |     |    |    |    | ✓  |
| CpG_to_CGI                                                                                             |               |    |    |    | ✓  |     |    | ✓  |    | ✓  |     |    |    |    | ✓  |
| DNase                                                                                                  | ✓             | ✓  |    |    |    | ✓   |    |    |    |    | ✓   |    |    |    |    |
| G_sat_50bp                                                                                             |               |    |    |    | ✓  |     |    | ✓  |    | ✓  | ✓   |    |    |    | ✓  |
| H2AK5ac                                                                                                |               |    |    |    |    |     |    |    |    |    |     |    |    |    |    |
| H3K27ac                                                                                                | ✓             |    |    |    |    |     |    |    | ✓  |    | ✓   |    |    |    | ✓  |
| H3K27me3                                                                                               |               |    |    | ✓  |    |     |    |    | ✓  |    |     |    |    |    | ✓  |
| H3K36me3                                                                                               |               |    |    | ✓  |    |     |    |    | ✓  |    |     | ✓  | ✓  | ✓  |    |
| H3K4me1                                                                                                | ✓             |    |    | ✓  |    | ✓   | ✓  |    | ✓  |    | ✓   | ✓  |    | ✓  |    |
| H3K4me3                                                                                                |               |    |    | ✓  |    |     |    |    | ✓  |    |     |    |    |    | ✓  |
| H3K79me1                                                                                               |               |    |    |    |    |     |    |    |    |    |     |    |    |    |    |
| H3K9ac                                                                                                 |               |    |    |    |    |     |    |    |    |    |     |    |    |    |    |
| H3K9me3                                                                                                | ✓             |    |    | ✓  |    | ✓   |    |    |    |    | ✓   |    |    |    |    |
| Histone_states                                                                                         |               | ✓  |    |    |    |     |    | ✓  |    |    | ✓   |    |    |    |    |
| Repeats                                                                                                |               | ✓  |    |    | ✓  |     | ✓  | ✓  |    | ✓  | ✓   |    |    |    | ✓  |
| CpG_Island                                                                                             |               |    |    |    |    |     |    | ✓  |    |    |     |    |    |    |    |
| CTCF                                                                                                   |               |    |    |    |    |     |    |    |    |    | ✓   | ✓  | ✓  |    |    |

| <b>(B) Random Forest OFS for NPC 5-hmC status prediction</b> |          |
|--------------------------------------------------------------|----------|
|                                                              | Features |
| Alu_repeat                                                   |          |
| Bp_to_CGI                                                    |          |
| CG_sat_50bp                                                  | ✓        |
| CpG_sat_50bp                                                 | ✓        |
| CpG_to_CGI                                                   | ✓        |
| DNase                                                        | ✓        |
| G_sat_50bp                                                   |          |
| H2AK5ac                                                      |          |
| H3K27ac                                                      | ✓        |
| H3K27me3                                                     | ✓        |
| H3K36me3                                                     |          |
| H3K4me1                                                      | ✓        |
| H3K4me3                                                      | ✓        |
| H3K79me1                                                     | ✓        |
| H3K9ac                                                       |          |
| H3K9me3                                                      | ✓        |
| Histone_states                                               | ✓        |
| Repeats                                                      |          |
| BS-seq_CCR                                                   | ✓        |
| CpG_Island                                                   |          |

**Supplementary Table T11:** Feature sets for 5-hmC status prediction in NPC, NPC enhancers, and H1 using SVM model (A) and in NPC dataset using RF model (B)



| Dependence of BS-seq prediction metric in NPC CGI on training and testing set size using SVM |           |        |         |           |        |
|----------------------------------------------------------------------------------------------|-----------|--------|---------|-----------|--------|
| Training                                                                                     |           |        | Testing |           |        |
| Size                                                                                         | Precision | Recall | Size    | Precision | Recall |
| 1000                                                                                         | 0.92      | 0.89   | 500     | 0.956     | 0.888  |
| 2000                                                                                         | 0.948     | 0.91   | 1000    | 0.956     | 0.9428 |
| 6000                                                                                         | 0.958     | 0.94   | 2000    | 0.967     | 0.9548 |
| 10000                                                                                        | 0.968     | 0.95   | 3000    | 0.9677    | 0.9555 |
| 15000                                                                                        | 0.68      | 0.951  | 5000    | 0.97      | 0.9555 |

**Supplementary Table T12:** Underlying data for Supplementary Figures 2A and 2B showing how precision and recall are affected by training and testing set size.

| (B): Precision/Recall values across different 5-hmC thresholds in NPC |           |             |
|-----------------------------------------------------------------------|-----------|-------------|
| Threshold                                                             | Precision | Recall      |
| 0.01                                                                  | 0.5838    | 0.588152327 |
| 0.02                                                                  | 0.5514    | 0.623473541 |
| 0.03                                                                  | 0.569     | 0.644686155 |
| 0.04                                                                  | 0.5886    | 0.689550141 |
| 0.05                                                                  | 0.625     | 0.732021551 |
| 0.06                                                                  | 0.6558    | 0.756401384 |
| 0.07                                                                  | 0.6892    | 0.768338907 |
| 0.08                                                                  | 0.7338    | 0.792954398 |
| 0.09                                                                  | 0.7528    | 0.814894999 |
| 0.10                                                                  | 0.771     | 0.817430025 |
| 0.11                                                                  | 0.7872    | 0.822914489 |
| 0.12                                                                  | 0.8128    | 0.832275241 |
| 0.13                                                                  | 0.8218    | 0.842180775 |
| 0.14                                                                  | 0.8356    | 0.841829539 |
| 0.15                                                                  | 0.8536    | 0.855482061 |
| 0.16                                                                  | 0.8564    | 0.845910707 |
| 0.17                                                                  | 0.8602    | 0.85371179  |
| 0.18                                                                  | 0.8658    | 0.863210369 |
| 0.19                                                                  | 0.8652    | 0.857312723 |
| 0.20                                                                  | 0.882     | 0.870337478 |
| 0.25                                                                  | 0.8846    | 0.884246301 |

| (A): Distinguishing between unmethylated (or non-hydroxymethylated) and marginally methylated (or hydroxymethylated) CpG sites in BS-seq and TAB-seq experiments based on sequencing depth using Fisher Exact Test |             |         |                     |             |         |
|--------------------------------------------------------------------------------------------------------------------------------------------------------------------------------------------------------------------|-------------|---------|---------------------|-------------|---------|
| BS-seq                                                                                                                                                                                                             |             |         | TAB-seq             |             |         |
| Sequencing Depth                                                                                                                                                                                                   |             |         | Sequencing Depth    |             |         |
| Sample1: #C                                                                                                                                                                                                        | Sample1: #T | p-value | Sample1: #C         | Sample1: #T | p-value |
| Sample2: #C                                                                                                                                                                                                        | Sample2: #T |         | Sample2: #C         | Sample2: #T |         |
| Sequencing Depth 8                                                                                                                                                                                                 |             |         | Sequencing Depth 48 |             |         |
| 4                                                                                                                                                                                                                  | 4           | 0.077   | 4                   | 44          | 0.117   |
| 0                                                                                                                                                                                                                  | 8           |         | 0                   | 48          |         |
| Sequencing Depth 10                                                                                                                                                                                                |             |         | Sequencing Depth 60 |             |         |
| 5                                                                                                                                                                                                                  | 5           | 0.0325  | 5                   | 55          | 0.057   |
| 0                                                                                                                                                                                                                  | 10          |         | 0                   | 60          |         |
| Sequencing Depth 12                                                                                                                                                                                                |             |         | Sequencing Depth 72 |             |         |
| 6                                                                                                                                                                                                                  | 6           | 0.014   | 6                   | 66          | 0.028   |
| 0                                                                                                                                                                                                                  | 12          |         | 0                   | 72          |         |

**Supplementary Table T13:** (A) Fisher's Exact Test shows statistical significance ( $p < \sim 0.05$ ) for distinguishing between a sample that is unmethylated (or non-hydroxymethylated) versus a sample that is marginally methylated (or hydroxymethylated) at sequencing depths of 10 for BS-seq data and 60 for TAB-seq data. (B) Underlying data for Supp Figure 4G, showing smooth change in prediction metric with change in CCR threshold for identifying 5-hmC status in training and testing sets for NPC datasets.

| <b>(A) Counts for genome wide imputation of 5-hmC using neighbouring sites across different window sizes (A-I evaluation sets: same as table below)</b> |         |           |          |          |
|---------------------------------------------------------------------------------------------------------------------------------------------------------|---------|-----------|----------|----------|
| Ids                                                                                                                                                     | TP      | TN        | FP       | FN       |
| A                                                                                                                                                       | 418464  | 41328087  | 1241926  | 1241202  |
| B                                                                                                                                                       | 579873  | 69248852  | 2140558  | 2139104  |
| C                                                                                                                                                       | 738763  | 105991323 | 3422785  | 3424418  |
| D                                                                                                                                                       | 1082363 | 193305489 | 6536477  | 6529338  |
| E                                                                                                                                                       | 2296306 | 497242071 | 18672602 | 18674921 |
| F                                                                                                                                                       | 2737617 | 718888372 | 30939446 | 31002174 |
| G                                                                                                                                                       | 2278368 | 642428371 | 30193001 | 30290416 |
| H                                                                                                                                                       | 2090107 | 603801513 | 29347926 | 29401784 |
| I                                                                                                                                                       | 1978227 | 585763859 | 28813642 | 28723890 |

| <b>(B) Predicting Tab-seq level status using neighbouring CpG sites with respect to the distance to the predicted site: results on balanced sets</b> |             |           |        |
|------------------------------------------------------------------------------------------------------------------------------------------------------|-------------|-----------|--------|
|                                                                                                                                                      | Window_size | Precision | Recall |
| A                                                                                                                                                    | 2-20bp      | 0.8963    | 0.2521 |
| B                                                                                                                                                    | 20-50bp     | 0.8767    | 0.2133 |
| C                                                                                                                                                    | 50-100bp    | 0.8501    | 0.1775 |
| D                                                                                                                                                    | 100-200bp   | 0.813     | 0.1422 |
| E                                                                                                                                                    | 200-500bp   | 0.7516    | 0.1095 |
| F                                                                                                                                                    | 500-1000bp  | 0.6629    | 0.0811 |
| G                                                                                                                                                    | 1000-1500bp | 0.6091    | 0.07   |
| H                                                                                                                                                    | 1500-2000bp | 0.5888    | 0.0664 |
| I                                                                                                                                                    | 2000-2500bp | 0.5788    | 0.0644 |

**Supplementary Table T14:** Prediction metric: TP, TN, FP, FN (A) and Precision and Recall (B) for 5-hmC status prediction based on nearest neighbor's 5-hmC status, showing that such an approach is not feasible for 5-hmC status imputation.

| Initial feature sets for BS-seq predictions in NPC and H1 |                               |
|-----------------------------------------------------------|-------------------------------|
| Initial Feature Set NPC BS-seq                            | Initial Feature Set H1 BS-seq |
| Alu_repeat                                                | Alu_repeat                    |
| Bp_to_CGI                                                 | Bp_to_CGI                     |
| CG_sat_50bp                                               | CG_sat_50bp                   |
| CpG_sat_50bp                                              | CpG_sat_50bp                  |
| CpG_to_CGI                                                | CpG_to_CGI                    |
| DNase                                                     | DNase                         |
| G_sat_50bp                                                | G_sat_50bp                    |
| H2AK5ac                                                   | H2AK5ac                       |
| H3K27ac                                                   | H3K27ac                       |
| H3K27me3                                                  | H3K27me3                      |
| H3K36me3                                                  | H3K36me3                      |
| H3K4me1                                                   | H3K4me1                       |
| H3K4me3                                                   | H3K4me3                       |
| H3K79me1                                                  | H3K79me1                      |
| H3K9ac                                                    | H3K9ac                        |
| H3K9me3                                                   | H3K9me3                       |
| Histone_states                                            | Histone_states                |
| Repeats                                                   | Repeats                       |
|                                                           | CTCF                          |
|                                                           | p300                          |

**Supplementary Table T15:** Initial Feature Sets for NPC and H1 methylation status prediction

## References

- Ahn,J.B., Chung,W.B., et al. (2011) DNA methylation predicts recurrence from resected stage III proximal colon cancer. *Cancer*, 117, 1847-1854.
- Amoreira,C., Hindermann,W., et al. (2003) An improved version of the DNA Methylation database (MethDB). *Nucleic Acids Res.*, 31, 75-77.
- Bachman,M., Uribe-Lewis,S., et al. (2014)  5-Hydroxymethylcytosine is a predominantly stable DNA modification. *Nature chemistry*.
- Bhasin,M., Zhang,H., et al. (2005) Prediction of methylated CpGs in DNA sequences using a support vector machine. *FEBS Lett.*, 579, 4302-4308.
- Bishop,C. (2007) Pattern Recognition and Machine Learning (Information Science and Statistics), 1st edn. 2006. corr. 2nd printing edn. *Springer, New York*.
- Bock,C., Paulsen,M., et al. (2006) CpG island methylation in human lymphocytes is highly correlated with DNA sequence, repeats, and predicted DNA structure. *PLoS Genet*, 2, e26.
- Bock,C., Halachev,K., et al. (2009) EpiGRAPH: user-friendly software for statistical analysis and prediction of (epi) genomic data. *Genome Biol.*, 10, 1.
- Bock,C., Tomazou,E.M., et al. (2010) Quantitative comparison of genome-wide DNA methylation mapping technologies. *Nat.Biotechnol.*, 28, 1106-1114.
- Bock,C., Walter,J., et al. (2007) CpG island mapping by epigenome prediction. *PLoS Comput Biol*, 3, e110.
- Booth,M.J., Branco,M.R., et al. (2012) Quantitative sequencing of 5-methylcytosine and 5-hydroxymethylcytosine at single-base resolution. *Science*, 336, 934-937.
- Carson,M.B., Langlois,R., et al. (2008)  Mining knowledge for the methylation status of CpG islands using alternating decision trees. , 3787-3790.
- Caruana,R. and Niculescu-Mizil,A. (2006)  An empirical comparison of supervised learning algorithms. , 161-168.
- Chadwick,L.H. (2012) The NIH roadmap  epigenomics program data resource.
- Chatterjee,A., Rodger,E.J., et al. (2012) Technical considerations for reduced  representation bisulfite sequencing with multiplexed libraries. *BioMed Research International*, 2012.
- Couldrey,C., Brauning,R., et al. (2014) Genome-wide DNA methylation patterns and transcription analysis in sheep muscle. *PloS one*, 9, e101853.
- Das,R., Dimitrova,N., et al. (2006) Computational prediction of methylation status in human genomic sequences. *Proc.Natl.Acad.Sci.U.S.A.*, 103, 10713-10716.
- Eckhardt,F., Lewin,J., et al. (2006) DNA methylation profiling of human chromosomes 6, 20 and 22. *Nat.Genet.*, 38, 1378-1385.
- Elango,N. and Yi,S.V. (2008) DNA methylation and structural and functional bimodality of vertebrate promoters. *Mol.Biol.Evol.*, 25, 1602-1608.
- Ernst,J. and Kellis,M. (2012) ChromHMM: automating chromatin-state discovery and characterization. *Nature methods*, 9, 215-216.
- Fan,S., Huang,K., et al. (2016) Predicting CpG methylation levels by integrating Infinium HumanMethylation450 BeadChip array data. *Genomics*, 107, 132-137.
- Fan,S., Zhang,M.Q., et al. (2008) Histone methylation marks play important roles in predicting the methylation status of CpG islands. *Biochem.Biophys.Res.Commun.*, 374, 559-564.
- Fan,S., Zou,J., et al. (2010) Predicted methylation landscape of all CpG islands on the human genome. *Chinese Science Bulletin*, 55, 2353-2358.
- Fang,F., Fan,S., et al. (2006) Predicting methylation status of CpG islands in the human brain. *Bioinformatics*, 22, 2204-2209.
- Feltus,F.A., Lee,E.K., et al. (2006) DNA motifs associated with aberrant CpG island methylation. *Genomics*, 87, 572-579.

- Feltus,F.A., Lee,E.K., et al. (2003) Predicting aberrant CpG island methylation. *Proc.Natl.Acad.Sci.U.S.A.*, 100, 12253-12258.
- Gaidatzis,D., Burger,L., et al. (2014) DNA sequence explains seemingly disordered methylation levels in partially methylated domains of Mammalian genomes. *PLoS Genet*, 10, e1004143.
- Guo,W., Fiziev,P., et al. (2013) BS-Seeker2: a versatile aligning pipeline for bisulfite sequencing data. *BMC Genomics*, 14, 774.
- Guo,H., Zhu,P., et al. (2013) Single-cell methylome landscapes of mouse embryonic stem cells and early embryos analyzed using reduced representation bisulfite sequencing. *Genome Res.*, 23, 2126-2135.
- Hackett,J.A., Sengupta,R., et al. (2013) Germline DNA demethylation dynamics and imprint erasure through 5-hydroxymethylcytosine. *Science*, 339, 448-452.
- Hahn,M.A., Szabó,P.E., et al. (2014) 5-Hydroxymethylcytosine: a stable or transient DNA modification? *Genomics*, 104, 314-323.
- Huang,D.W., Sherman,B.T., et al. (2009) Systematic and integrative analysis of large gene lists using DAVID bioinformatics resources. *Nature protocols*, 4, 44-57.
- Kantlehner,M., Kirchner,R., et al. (2011) A high-throughput DNA methylation analysis of a single cell. *Nucleic Acids Res.*, 39, e44.
- Kim,S., Li,M., et al. (2008) Predicting DNA methylation susceptibility using CpG flanking sequences. , 13, 315-326.
- Krueger,F. and Andrews,S.R. (2011) Bismark: a flexible aligner and methylation caller for Bisulfite-Seq applications. *Bioinformatics*, 27, 1571-1572.
- Kundaje,A., Meuleman,W., et al. (2015) Integrative analysis of 111 reference human epigenomes. *Nature*, 518, 317-330.
- Langmead,B. and Salzberg,S.L. (2012) Fast gapped-read alignment with Bowtie 2. *Nature methods*, 9, 357-359.
- Lister,R., Pelizzola,M., et al. (2009) Human DNA methylomes at base resolution show widespread epigenomic differences. *Nature*, 462, 315-322.
- Lu,L., Lin,K., et al. (2010) Predicting DNA methylation status using word composition. *Journal of Biomedical Science and Engineering*, 3, 672.
- Ma,B., Wilker,E.H., et al. (2014) Predicting DNA methylation level across human tissues. *Nucleic Acids Res.*, 42, 3515-3528.
- Marina,R.J., Sturgill,D., et al. (2015) TET-catalyzed oxidation of intragenic 5-methylcytosine regulates CTCF-dependent alternative splicing. *EMBO J.*, e201593235.
- Meissner,A., Gnirke,A., et al. (2005) Reduced representation bisulfite sequencing for comparative high-resolution DNA methylation analysis. *Nucleic Acids Res.*, 33, 5868-5877.
- Mellen,M., Ayata,P., et al. (2012) MeCP2 binds to 5hmC enriched within active genes and accessible chromatin in the nervous system. *Cell*, 151, 1417-1430.
- Pan,S.J. and Yang,Q. (2010) A survey on transfer learning. *IEEE Trans.Knowled.Data Eng.*, 22, 1345-1359.
- Plongthongkum,N., Diep,D.H., et al. (2014) Advances in the profiling of DNA modifications: cytosine methylation and beyond. *Nature Reviews Genetics*, 15, 647-661.
- Previti,C., Harari,O., et al. (2009) Profile analysis and prediction of tissue-specific CpG island methylation classes. *BMC Bioinformatics*, 10, 1.
- Qu,J., Zhou,M., et al. (2013) MLML: consistent simultaneous estimates of DNA methylation and hydroxymethylation. *Bioinformatics*, 29, 2645-2646.
- Quinlan,A.R. and Hall,I.M. (2010) BEDTools: a flexible suite of utilities for comparing genomic features. *Bioinformatics*, 26, 841-842.

- Rollins,R.A., Haghghi,F., et al. (2006) Large-scale structure of genomic methylation patterns. *Genome Res.*, 16, 157-163.
- Shen,L. and Zhang,Y. (2013) 5-Hydroxymethylcytosine: generation, fate, and genomic distribution. *Curr.Opin.Cell Biol.*, 25, 289-296.
- Smith,A.D., Chung,W.Y., et al. (2009) Updates to the RMAP short-read mapping software. *Bioinformatics*, 25, 2841-2842.
- Speir,M.L., Zweig,A.S., et al. (2016) The UCSC Genome Browser database: 2016 update. *Nucleic Acids Res.*, 44, D717-25.
- Stadler,M.B., Murr,R., et al. (2011) DNA-binding factors shape the mouse methylome at distal regulatory regions. *Nature*.
- Teif,V.B., Beshnova,D.A., et al. (2014) Nucleosome repositioning links DNA (de)methylation and differential CTCF binding during stem cell development. *Genome Res.*, 24, 1285-1295.
- The Gene Ontology Consortium. (2017) Expansion of the Gene Ontology knowledgebase and resources. *Nucleic Acids Res.*, 45, D331-D338.
- Wang,T., Pan,Q., et al. (2012) Genome-wide DNA hydroxymethylation changes are associated with neurodevelopmental genes in the developing human cerebellum. *Hum.Mol.Genet.*, 21, 5500-5510.
- Wang,Y., Liu,T., et al. (2016) Predicting DNA Methylation State of CpG Dinucleotide Using Genome Topological Features and Deep Networks. *Scientific Reports*, 6, 19598.
- Whyte,W.A., Orlando,D.A., et al. (2013) Master transcription factors and mediator establish super-enhancers at key cell identity genes. *Cell*, 153, 307-319.
- Xi,Y. and Li,W. (2009) BSMAP: whole genome bisulfite sequence MAPPING program. *BMC Bioinformatics*, 10, 232.
- Yamada,Y., Watanabe,H., et al. (2004) A comprehensive analysis of allelic methylation status of CpG islands on human chromosome 21q. *Genome Res.*, 14, 247-266.
- Yan,H., Zhang,D., et al. (2015) Chromatin modifications and genomic contexts linked to dynamic DNA methylation patterns across human cell types. *Scientific reports*, 5.
- Yu,M., Hon,G.C., et al. (2012) Base-resolution analysis of 5-hydroxymethylcytosine in the mammalian genome. *Cell*, 149, 1368-1380.
- Zeng,J., Konopka,G., et al. (2012a) Divergent whole-genome methylation maps of human and chimpanzee brains reveal epigenetic basis of human regulatory evolution. *The American Journal of Human Genetics*, 91, 455-465.
- ~~Zeng,J., Konopka,G., et al. (2012b) Divergent whole-genome methylation maps of human and chimpanzee brains reveal epigenetic basis of human regulatory evolution. *The American Journal of Human Genetics*, 91, 455-465.~~
- Zhang,W., Zheng,H., et al. (2011) Nucleosome positioning plays an important role in predicting the methylation status of CpG islands. , 3, 1580-1583.
- Zhang,W., Spector,T.D., et al. (2015) Predicting genome-wide DNA methylation using methylation marks, genomic position, and DNA regulatory elements. *Genome Biol.*, 16, 14.
- Zhang,Y., Liu,T., et al. (2008) Model-based analysis of ChIP-Seq (MACS). *Genome Biol.*, 9, R137.
- Zheng,H., Wu,H., et al. (2013) CpGIMethPred: computational model for predicting methylation status of CpG islands in human genome. *BMC medical genomics*, 6, S13.
- Zhou,X., Li,Z., et al. (2012) Prediction of methylation CpGs and their methylation degrees in human DNA sequences. *Comput.Biol.Med.*, 42, 408-413.
